# Supplementary material for: Study protocol for a multicentre, cluster randomised, superiority trial evaluating the impact of computerised decision support, audit and feedback on antibiotic use: the COMPuterized Antibiotic Stewardship Study (COMPASS)
Source: PubMed Central journal article supplement — BMJ Open. 2018 Jun 27;8(6):e022666. doi: 10.1136/bmjopen-2018-022666 (PMC6042555; doi:10.1136/bmjopen-2018-022666), 2018-06-27
Supplement: bmjopen-2018-022666.draft_revisions.pdf [file bmjopen-2018-022666.draft_revisions.pdf]

# BMJ Open

BMJ Open is committed to open peer review. As part of this commitment we make the peer review history of every article we publish publicly available.

When an article is published we post the peer reviewers' comments and the authors' responses online. We also post the versions of the paper that were used during peer review. These are the versions that the peer review comments apply to.

The versions of the paper that follow are the versions that were submitted during the peer review process. They are not the versions of record or the final published versions. They should not be cited or distributed as the published version of this manuscript.

BMJ Open is an open access journal and the full, final, typeset and author-corrected version of record of the manuscript is available on our site with no access controls, subscription charges or pay-per-view fees (<http://bmjopen.bmj.com>).

If you have any questions on BMJ Open's open peer review process please email [info.bmjopen@bmj.com](mailto:info.bmjopen@bmj.com)

# BMJ Open

## A study protocol for a multicentre, cluster-randomised, superiority trial evaluating the impact of computerized decision support, audit and feedback on antibiotic use: The Computerized Antibiotic Stewardship Study (COMPASS)

|                                                                                                                                                                                         |                                                                                                                                                                                                                                                                                                                                                                                                                                                                                                                                                                                                                                                                                                                                                                                                                                                                                                                                                                                                                                                                                                                     |
|-----------------------------------------------------------------------------------------------------------------------------------------------------------------------------------------|---------------------------------------------------------------------------------------------------------------------------------------------------------------------------------------------------------------------------------------------------------------------------------------------------------------------------------------------------------------------------------------------------------------------------------------------------------------------------------------------------------------------------------------------------------------------------------------------------------------------------------------------------------------------------------------------------------------------------------------------------------------------------------------------------------------------------------------------------------------------------------------------------------------------------------------------------------------------------------------------------------------------------------------------------------------------------------------------------------------------|
| Journal:                                                                                                                                                                                | <i>BMJ Open</i>                                                                                                                                                                                                                                                                                                                                                                                                                                                                                                                                                                                                                                                                                                                                                                                                                                                                                                                                                                                                                                                                                                     |
| Manuscript ID                                                                                                                                                                           | bmjopen-2018-022666                                                                                                                                                                                                                                                                                                                                                                                                                                                                                                                                                                                                                                                                                                                                                                                                                                                                                                                                                                                                                                                                                                 |
| Article Type:                                                                                                                                                                           | Protocol                                                                                                                                                                                                                                                                                                                                                                                                                                                                                                                                                                                                                                                                                                                                                                                                                                                                                                                                                                                                                                                                                                            |
| Date Submitted by the Author:                                                                                                                                                           | 07-Mar-2018                                                                                                                                                                                                                                                                                                                                                                                                                                                                                                                                                                                                                                                                                                                                                                                                                                                                                                                                                                                                                                                                                                         |
| Complete List of Authors:                                                                                                                                                               | Catho, Gaud; Geneva University Hospital and Faculty of Medicine, Division of Infectious Diseases<br>de Kraker, Marlieke; Geneva University Hospital and Faculty of Medicine, Infection Control Program<br>Waldispühl Suter, Brigitte; Ente Ospedaliero Cantonale, Division of clinical informatics<br>Valotti, Roberta; Ospedale Regionale di Lugano, Ente Ospedaliero Cantonale, Division of Infectious Diseases<br>Harbarth, Stephan; Geneva University Hospital and Faculty of Medicine, Infection Control Program; Geneva University Hospital and Faculty of Medicine, Division of Infectious Diseases<br>Kaiser, Laurent; Geneva University Hospital and Faculty of Medicine, Division of Infectious Diseases<br>Elzi, Luigia; Ospedale San Giovanni, Ente Ospedaliero Cantonale, Division of Infectious Diseases<br>Meyer, Rodolphe; Geneva University Hospital, Division of informatics<br>Bernasconi, Enos; Ospedale Regionale di Lugano, Ente Ospedaliero Cantonale, Division of Infectious Diseases<br>Huttner, Benedikt D; Geneva University Hospital and Faculty of Medicine, Infection Control Program |
| Keywords:                                                                                                                                                                               | antimicrobial stewardship, computerized decision support system, cluster-randomised trial                                                                                                                                                                                                                                                                                                                                                                                                                                                                                                                                                                                                                                                                                                                                                                                                                                                                                                                                                                                                                           |
| <p>Note: The following files were submitted by the author for peer review, but cannot be converted to PDF. You must view these files (e.g. movies) online.</p> <p>Figure_1 (35).jpg</p> |                                                                                                                                                                                                                                                                                                                                                                                                                                                                                                                                                                                                                                                                                                                                                                                                                                                                                                                                                                                                                                                                                                                     |

SCHOLARONE™  
Manuscripts

1  
2  
3  
4 **A study protocol for a multicentre, cluster-randomised,**  
5 **superiority trial evaluating the impact of computerized**  
6 **decision support, audit and feedback on antibiotic use:**  
7 **The Computerized Antibiotic Stewardship Study**  
8 **(COMPASS)**  
9

10  
11  
12 **AUTHORS AND AFFILIATIONS**  
13

14 Gaud Catho<sup>1</sup>, Marlieke De Kraker<sup>2</sup>, Brigitte Waldispühl Suter<sup>3</sup>, Roberta Valotti<sup>4</sup>, Stephan  
15 Harbarth<sup>1,2</sup>, Laurent Kaiser<sup>1</sup>, Luigia Elzi<sup>5</sup>, Rodolphe Meyer<sup>6</sup>, Enos Bernasconi<sup>4</sup>, Benedikt D.  
16 Huttner<sup>1,2</sup>  
17  
18  
19

20  
21 <sup>1</sup>Division of Infectious Diseases, Geneva University Hospital and Faculty of Medicine,  
22 Geneva, Switzerland  
23

24 <sup>2</sup>Infection Control Program, Geneva University Hospital and Faculty of Medicine, Geneva,  
25 Switzerland  
26

27 <sup>3</sup>Division of clinical informatics, Ente Ospedaliero Cantonale, Bellinzona, Switzerland  
28

29 <sup>4</sup>Division of Infectious Diseases, Ospedale Regionale di Lugano, Ente Ospedaliero Cantonale,  
30 Lugano, Switzerland  
31

32 <sup>5</sup>Division of Infectious Diseases, Ospedale San Giovanni, Ente Ospedaliero Cantonale,  
33 Bellinzona, Switzerland  
34

35 <sup>6</sup>Division of informatics, Geneva University Hospital, Geneva, Switzerland  
36  
37

38  
39  
40 Corresponding author's email address: [catho.gaud@hcuge.ch](mailto:catho.gaud@hcuge.ch)  
41  
42  
43  
44  
45  
46  
47  
48  
49  
50  
51  
52  
53  
54  
55  
56  
57  
58  
59  
60

## ABSTRACT

**INTRODUCTION:** Inappropriate use of antimicrobials in hospitals contributes to antimicrobial resistance. Antimicrobial stewardship (AMS) interventions aim to improve antimicrobial prescribing, but they are often resource and personnel intensive. Computerized Decision Support Systems (CDSS) seem a promising tool to improve antimicrobial prescribing but have been insufficiently studied in clinical trials.

**METHODS AND ANALYSIS:** The COMPUterized Antibiotic Stewardship Study (COMPASS) trial is a publically funded, open-label, cluster-randomised, controlled superiority trial which aims to determine whether a multi-modal CDSS intervention integrated in the electronic health record (EHR) reduces overall antibiotic exposure in adult patients hospitalized in wards of two secondary and one tertiary care centre in Switzerland compared to “standard-of-care” AMS. Twenty-four hospital wards will be randomised 1:1 to either intervention or control, using a “pair-matching” approach based on baseline antibiotic use, specialty and centre. The intervention will consist of (1) decision support for the choice of antimicrobial treatment and duration of treatment for selected indications (based on indication entry), (2) accountable justification for deviation from the local guidelines (with regard to the choice of molecules and duration), (3) alerts for self-guided re-evaluation of treatment on calendar day 4 of antimicrobial therapy and (4) monthly ward-level feedback of antimicrobial prescribing indicators. The primary outcome will be the difference in overall systemic antibiotic use measured in days of therapy (DOT) per admission based on administration data recorded in the EHR over the whole intervention period (12 months), taking into account clustering. Secondary outcomes include qualitative and quantitative antimicrobial use indicators, economic outcomes and clinical, microbiological and patient safety indicators.

**ETHICS AND DISSEMINATION:** Ethics approval was obtained for all participating sites (CCER 2017-00454). The results of the trial will be submitted for publication in a peer-reviewed journal. Further dissemination activities will be presentations / posters at national and international conferences.

**TRIAL REGISTRATION NUMBER:** NCT03120975

## ARTICLE SUMMARY

### Strengths and limitations of this study

- The use of a multicentre randomised design in a research area where there is a clear lack of high-quality trials (impact: increased internal validity)
- The intervention will be tested in a diverse setting of hospitals in different cultural / language regions of the same country (impact: increased external validity) and it is relatively easy to implement uniformly (impact: increased external validity)
- Overall, antimicrobial prescribing levels in the participating centres are already relatively low compared to levels in other countries (about 50-60 Defined Daily Dose (DDD) per 100 patient-days) (impact: reduced external validity; higher risk of “negative” trial)
- While the intervention should be implementable elsewhere, it requires modifications in the EHR / CPOE system which may be difficult to implement in settings using software by commercial vendors (impact: reduced external validity)
- This is a cluster randomised trial with the ward as the “unit of randomisation”. A certain degree of “contamination” is therefore unavoidable, *e.g.* through physicians changing between wards, although the degree is lower than for an individual randomised trial (impact: higher risk of “negative” trial)

## INTRODUCTION

Inappropriate use of antimicrobials in hospitals is one of the key drivers of antimicrobial resistance (AMR) and *Clostridium difficile* infection (CDI). The purpose of antimicrobial stewardship (AMS) is, by definition, to protect this limited resource and stave off the negative consequences of its inadequate use while at the same time optimizing patient outcomes.[1] AMS programs have been implemented in thousands of hospitals around the world, in some areas by legal mandate.[2, 3] While there is increasing evidence that AMS can generally reduce drug costs, AMR and CDI in the hospital setting, we still do not know which particular AMS interventions provide the best and most sustainable improvements in antibiotic prescribing with the best cost-effectiveness.[4-6] In particular, many AMS interventions are labor-intensive and require “manual” assessment of individual situations by dedicated experts such as infectious diseases specialists or pharmacists.[7-11] This is problematic since it limits interventions to a small proportion of all prescriptions. Moreover, it threatens sustainability, since there are always competing hospital priorities resulting in limited resources for AMS programs

There is thus a need to at least partially automate AMS interventions. The 2016 AMS guidelines by the Infectious Diseases Society of America and the Society for Healthcare Epidemiology of America indicate moderate-quality evidence for the incorporation of CDSS at the time of prescribing.[12] Computerized decision support systems (CDSS) to improve antimicrobial use have been implemented before, but there is clearly a lack of high-quality studies assessing their impact on actual antimicrobial prescribing and patient outcomes. The vast majority of studies in this area are uncontrolled before-after studies which have a much higher risk of bias and lower external validity.[13] A recent systematic review of computerised decision support for antibiotic use in hospitals identified only six randomised controlled studies among the 81 studies included in the review, of which half (3) were single-site studies. [14] Another earlier systematic review, also mostly identified low-quality, single centre, before-after studies and concluded that “high quality, systematic, multi-site, comparative studies are critically needed to assist organizations in making informed decisions about the most effective IT interventions.”[15] Furthermore, existing studies often limited assessment to specific situations and settings, such as increasing guideline compliance in the treatment of UTI[16] and critically ill patients[17] , and to

1  
2  
3 improve empirical antibiotic treatment for patients with suspected bacterial infections.[18]  
4 CDSS are also often overly complex, poorly designed, not integrated into the workflow,  
5 expensive, or difficult to implement in heterogeneous clinical settings.[19]  
6  
7

8 The COMPASS trial aims to address this evidence-gap by assessing through a  
9 randomised multicenter trial, if a CDSS integrated into the workflow can reduce DOT per  
10 admission in the intervention wards compared to controlled wards, over a one-year period.  
11  
12

## 13 14 **METHODS AND ANALYSIS**

### 15 16 17 **Study setting**

18  
19 COMPASS will be conducted in adult acute-care wards of three Swiss hospitals, one  
20 academic medical centre and two regional hospitals. HUG (Geneva University Hospitals) is  
21 one of the largest hospitals in Switzerland with about 1'800 beds and 700'000 patient-days  
22 per year.[20] HUG has deployed an in-house electronic health record (EHR) since 2000 and a  
23 computerized physician order entry system (CPOE) system since 2006.[21] ORL (Regional  
24 Hospital Lugano) and OSG (Regional Hospital Bellinzona) are the largest hospitals of  
25 Southern Switzerland, with respectively 306 and 228 beds, and about 100'000 and 72'000  
26 patients-days per year. Both hospitals have developed and adapted an EHR and CPOE  
27 system based on the in-house system of HUG since 2008 and 2014, respectively. All three  
28 hospitals have AMS programs with regularly updated antimicrobial prescribing guidelines,  
29 review of all positive blood cultures, regular teaching sessions for physicians, and internal  
30 and external benchmarking of antibiotic use and resistance. Dedicated ward rounds in some  
31 divisions (*e.g.* the intensive care unit and hematologic or solid organ transplant wards), are  
32 also part of the AMS program at HUG; however, these units will not be included into  
33 COMPASS. The overall framework for the COMPASS intervention is identical in all study  
34 sites; given the particularities of each setting (different EHRs, different categories of  
35 hospitals; different language; different prescribing guidelines) some details of the  
36 intervention may slightly vary between sites.  
37  
38  
39  
40  
41  
42  
43  
44  
45  
46  
47  
48  
49  
50

### 51 52 **Intervention**

53  
54 The intervention will consist of four components (figure 1):  
55  
56  
57  
58  
59  
60

- 1
- 2
- 3 (1) Decision support for antimicrobial treatment with regard to the choice of antimicrobial
- 4 drugs based on indication entry and current, local guidelines with accountable justification
- 5 for guideline deviation;
- 6
- 7
- 8 (2) Alerts for self-guided re-evaluation of antimicrobial therapy on calendar day 4 of
- 9 therapy;
- 10
- 11 (3) Decision support for the duration of antimicrobial treatment based on indication entry
- 12 and current, local guidelines with accountable justification for guideline deviation and;
- 13
- 14 (4) Regular feedback of unit-wide antimicrobial prescribing indicators
- 15
- 16
- 17

### 18 (1) Decision support for antimicrobial treatment

19  
20 When physicians prescribe a systemic antimicrobial agent (including antifungals & antivirals  
21 except antiretroviral drugs used for the treatment of HIV) in the CPOE they will be asked to  
22 select whether the treatment is used for empiric treatment, targeted treatment or  
23 prophylaxis and to select the main indication of treatment based on a pre-specified list of  
24 indications linked to an international terminology such as International Statistical  
25 Classification of Diseases and Related Health Problems 10th Revision (ICD-10) and  
26 Systematized Nomenclature of Medicine-Clinical Terms (SNOMED-CT). If a treatment  
27 recommendation exists in the local guidelines for the given indication and the treatment  
28 regimen prescribed deviates from this recommendation, the prescriber will be offered the  
29 choice to switch to the guideline-recommended treatment; otherwise prescribers will be  
30 asked to provide an “accountable justification” for the deviation from the guidelines (a  
31 predefined list of potential reasons will be provided with the availability to also enter free  
32 text). The proposed system ensures that each antibiotic prescription is linked to a  
33 retrievable indication, making it possible to assess prescribing quality and to provide specific  
34 decision support.  
35  
36  
37  
38  
39  
40  
41  
42  
43  
44  
45  
46  
47

### 48 (2) Self-guided evaluation alert

49  
50 On the fourth calendar day of antimicrobial treatment, a visual electronic alert displayed in  
51 the patient’s electronic medical chart will remind prescribers to reassess treatment with  
52 regard to intravenous-oral switch, de-escalation or stopping therapy. The alert will not be  
53 blocking (i.e. if the alert is ignored by the prescriber the antimicrobial prescription will  
54  
55  
56  
57  
58  
59  
60



1  
2  
3 remain active), it will, however, continue to be displayed until it is addressed. Furthermore,  
4 the alert will also be displayed on the “visual synopsis” of all patients hospitalized in the  
5 ward, making it possible for nursing staff to remind prescribers to address the alert.  
6  
7

8 The re-evaluation of treatment will be self-guided, i.e. there will be no decision-  
9 support guiding treatment adaptation based on patient-specific data such as vital signs,  
10 microbiologic results or use of other medications. General information useful for re-  
11 evaluation, such as iv-oral switch criteria, will be provided as info-buttons. If the  
12 antimicrobial treatment is continued or modified, prescribers will be asked to reassess the  
13 indication (since the indication may change over a course of antimicrobial treatment). If the  
14 antimicrobial treatment is modified on calendar day 3, re-evaluation will be assumed to  
15 have taken place and no alert will be displayed on day 4.  
16  
17  
18  
19  
20  
21  
22

### 23 (3) Decision support for duration of treatment

24 At the time of re-evaluation, the guideline-concordant duration will be automatically  
25 proposed. If this duration is exceeded, a justification will have to be provided.  
26  
27  
28  
29

### 30 (4) Systematic audit and feedback

31 Quality indicators of antimicrobial prescribing such as concordance with local guidelines (in  
32 terms of duration of therapy and drug) will be automatically assessed based on the  
33 information collected during the prescribing process. All physicians on a given intervention  
34 ward will receive monthly e-mails outlining the performance of the ward compared to the  
35 other participating wards and compared to the guideline recommendation (if applicable).  
36 The results will be presented graphically.  
37  
38  
39  
40  
41  
42  
43

### 44 Duration of the intervention period

45 The intervention period will last 12 months. If the intervention proves to be successful  
46 based on analyses of the data, the system will also be implemented in the control wards and  
47 the effect will continue to be monitored in all wards to assess the sustainability of the  
48 intervention after the end of the research study.  
49  
50  
51  
52  
53  
54  
55  
56  
57  
58  
59  
60

## Control

The control will consist of routine, “standard-of-care” antimicrobial stewardship as described above.

## Sample size

The sample size calculation is based on the primary outcome (DOT per admission) and has been performed taking into account the pair-matched and clustered design of the study according to the approach proposed by Hayes and Bennett.[22] Assuming 12 wards per arm, with an average size of 500 admissions, antibiotic use of 4.0 DOT/admission in the control group with a standard deviation of 1.0 (based on preliminary antibiotic use data) and a two-sided type I error of 0.05 we would have a power of 80% to detect a relative difference in average DOT/admission between the intervention and control arm of at least 7.7%. Antibiotic stewardship interventions described in the published literature have often exceeded this effect size.[23]

## Inclusion criteria and randomisation

Twenty-four acute-wards fulfilling the inclusion criteria (table 1) will be recruited by approaching the heads of the concerned departments (16 wards at HUG, 4 wards at ORL and OSG each). Acute wards will be paired according to centre, specialty (e.g., medicine, surgery, geriatrics), and baseline antibiotic use in days of therapy (DOT)/admission. Wards will be randomised 1:1 to the intervention or control arm within each pair using an online random sequence generator (figure 2). The randomisation plan will be established by personnel not directly involved in the study. Depending on the recruitment of wards, specialities may be matched across ORL and OSG since due to the smaller size these hospitals may only have one ward per specialty (e.g. visceral surgery, orthopaedics). In that case randomisation may be constrained to make sure that each hospital has at least one intervention ward in either specialty (e.g. orthopaedics or visceral surgery).

## Outcomes

Table 2 gives a detailed overview of the primary and secondary outcomes, the underlying hypothesis and the justification for the choice of outcomes.

### Primary outcome

The difference in overall systemic antibiotic use measured in days of therapy (DOT) of systemic antibiotic use per admission based on electronically recorded drug administration data (for details see table 2).[24] One DOT represents a specific antibiotic administered to an individual patient on a calendar day independent of dose and route.

### Secondary outcomes

Secondary outcomes include quantitative and qualitative antimicrobial use indicators, clinical outcomes, microbiologic outcomes, economic outcomes and user satisfaction (see table 2 for more detailed definitions).[25, 26]

### Blinding

Neither the study staff implementing the intervention, nor the physicians targeted by the intervention, nor the patients receiving treatments will be blinded to an individual ward's assignment group since the nature of the intervention makes this impossible. Extraction of the primary and secondary outcome measures will be performed primarily by administrative staff not involved in the study. The data analysts will be blinded to the treatment allocation.

### Study schedule

The intervention is scheduled to begin mid-2018.

## Analysis

Outcome variables will first be summarized across treatment and intervention groups and then explored using descriptive statistics, taking into account the matched design by sandwich variance estimators for confidence intervals. The DOT/admission at the individual level will be compared between the intervention groups using a random effects poisson model with two levels, taking into account clustering within hospitals and the matched pairs. The following confounders will be considered: sex, age, type of comorbidities and type of admission (internal medicine versus other), whereby all variables that result in a change of >5% in the coefficient for the intervention effect in bivariate regression will be added to the multivariate model, and the most parsimonious model will be selected through the conditional AIC. Collinearity will be checked through a correlation matrix, whereby the most relevant, clinical variable will be selected in case of R-square>0.8.

## Data collection and management

Most data will be retrieved from the hospital's data warehouses. De-identified data will be stored in password protected Microsoft Excel files on secured hospital servers. For the secondary outcome "qualitative assessment of antibiotic use" a eCRF will be created in an electronic data capture system such as REDCap (REDCap Consortium).

For analysis data will be imported into a statistical program, such as Stata (StataCorp, College Station, Texas) or "R" (R Foundation for Statistical Computing). Only investigators directly involved in the trial will have access to the data. The data will be stored on secure servers with backup systems for 10 years.

## Patient and Public Involvement

Patients and Public were not involved in the development of the research question, study design or any other part of this protocol.

## ETHICS AND DISSEMINATION

The trial has been approved by the competent ethics committees in Geneva and Ticino (CCER n° 2017-00454). A waiver of informed consent by prescribers and patients was

1  
2  
3 granted under the condition to provide an information leaflet to patients in the participating  
4 wards. Several publications in peer-reviewed journals are planned from this trial: these will  
5 include the description of the development of the intervention, and main findings of the  
6 trial. Furthermore, the findings will be presented at national and international conferences.  
7  
8  
9

## 10 11 12 **DISCUSSION** 13

14  
15 To our knowledge the COMPASS trial will be one of the first multicentre, cluster randomised  
16 controlled trials to assess whether a pragmatic CDSS integrated into the electronic health  
17 record can reduce overall antibiotic use in a diverse setting of hospitals. Our study has  
18 several strengths and limitations which are outlined in the article summary. COMPASS  
19 addresses many of the limitations of previous studies regarding the impact of CDSS on  
20 antimicrobial use in hospitals.[13] A limitation of COMPASS is the fact that the combination  
21 of different interventions will make it difficult to identify which component is the most  
22 effective; this can hopefully be addressed in further research. We believe that COMPASS is  
23 innovative in combining relatively new strategies for AMS, such as “accountable  
24 justification” with well-established strategies like audit and feed-back leveraging the  
25 potentials of the electronic health record.[27, 28] If effective, similar systems could be  
26 adapted in many hospitals given the relatively “simple” design of the CDSS intervention.  
27  
28  
29  
30  
31  
32  
33  
34  
35  
36  
37  
38  
39  
40  
41  
42  
43  
44  
45  
46  
47  
48  
49  
50  
51  
52  
53  
54  
55  
56  
57  
58  
59  
60

## REFERENCES

1. Dyar OJ, Huttner B, Schouten J, et al. What is antimicrobial stewardship? *Clin Microbiol Infect* 2017;23:793-8.
2. Trivedi KK, Dumartin C, Gilchrist M, et al. Identifying best practices across three countries: hospital antimicrobial stewardship in the United Kingdom, France, and the United States. *Clin Infect Dis* 2014;59 Suppl 3:S170-8.
3. Howard P, Pulcini C, Levy Hara G, et al. An international cross-sectional survey of antimicrobial stewardship programmes in hospitals. *J Antimicrob Chemother* 2015;70:1245-55.
4. Davey P, Marwick CA, Scott CL, et al. Interventions to improve antibiotic prescribing practices for hospital inpatients. *Cochrane Database Syst Rev* 2017;2:CD003543.
5. Baur D, Gladstone BP, Burkert F, et al. Effect of antibiotic stewardship on the incidence of infection and colonisation with antibiotic-resistant bacteria and *Clostridium difficile* infection: a systematic review and meta-analysis. *Lancet Infect Dis* 2017;17:990-1001.
6. Naylor NR, Zhu N, Hulscher M, et al. Is antimicrobial stewardship cost-effective? A narrative review of the evidence. *Clin Microbiol Infect* 2017;23:806-11.
7. Lesprit P, de Pontfarcy A, Esposito-Farese M, et al. Postprescription review improves in-hospital antibiotic use: a multicenter randomized controlled trial. *Clin Microbiol Infect* 2015;21:180 e1-7.
8. Senn L, Burnand B, Francioli P, et al. Improving appropriateness of antibiotic therapy: randomized trial of an intervention to foster reassessment of prescription after 3 days. *J Antimicrob Chemother* 2004;53:1062-7.
9. Manuel O, Burnand B, Bady P, et al. Impact of standardised review of intravenous antibiotic therapy 72 hours after prescription in two internal medicine wards. *J Hosp Infect* 2010;74:326-31.
10. Cosgrove SE, Seo SK, Bolon MK, et al. Evaluation of postprescription review and feedback as a method of promoting rational antimicrobial use: a multicenter intervention. *Infect Control Hosp Epidemiol* 2012;33:374-80.
11. Uckay I, Vernaz-Hegi N, Harbarth S, et al. Activity and impact on antibiotic use and costs of a dedicated infectious diseases consultant on a septic orthopaedic unit. *J Infect* 2009;58:205-12.
12. Barlam TF, Cosgrove SE, Abbo LM, et al. Implementing an Antibiotic Stewardship Program: Guidelines by the Infectious Diseases Society of America and the Society for Healthcare Epidemiology of America. *Clin Infect Dis* 2016.
13. de Kraker MEA, Abbas M, Huttner B, et al. Good epidemiological practice: a narrative review of appropriate scientific methods to evaluate the impact of antimicrobial stewardship interventions. *Clin Microbiol Infect* 2017;23:819-25.
14. Curtis CE, Al Bahar F, Marriott JF. The effectiveness of computerised decision support on antibiotic use in hospitals: A systematic review. *PLoS One* 2017;12:e0183062.
15. Baysari MT, Lehnbohm EC, Li L, et al. The effectiveness of information technology to improve antimicrobial prescribing in hospitals: A systematic review and meta-analysis. *Int J Med Inform* 2016;92:15-34.

16. Demonchy E, Dufour JC, Gaudart J, et al. Impact of a computerized decision support system on compliance with guidelines on antibiotics prescribed for urinary tract infections in emergency departments: a multicentre prospective before-and-after controlled interventional study. *J Antimicrob Chemother* 2014;69:2857-63.
17. Nachtigall I, Tafelski S, Deja M, et al. Long-term effect of computer-assisted decision support for antibiotic treatment in critically ill patients: a prospective 'before/after' cohort study. *BMJ Open* 2014;4:e005370.
18. Paul M, Andreassen S, Tacconelli E, et al. Improving empirical antibiotic treatment using TREAT, a computerized decision support system: cluster randomized trial. *J Antimicrob Chemother* 2006;58:1238-45.
19. Rawson TM, Moore LSP, Hernandez B, et al. A systematic review of clinical decision support systems for antimicrobial management: are we failing to investigate these interventions appropriately? *Clin Microbiol Infect* 2017.
20. HUG en bref - chiffres clés 2014. [https://www.hug-ge.ch/sites/interhug/files/images/hug\\_en\\_bref/chiffres-cles/chiffres-cles-2016.pdf](https://www.hug-ge.ch/sites/interhug/files/images/hug_en_bref/chiffres-cles/chiffres-cles-2016.pdf)
21. Iten A, Perrier A, Lovis C. [Deployment of a computerized physician order entry: description of the process and challenges]. *Rev Med Suisse* 2006;2:2344-6, 8-9.
22. Hayes RJ, Bennett S. Simple sample size calculation for cluster-randomized trials. *Int J Epidemiol* 1999;28:319-26.
23. Davey P, Brown E, Charani E, et al. Interventions to improve antibiotic prescribing practices for hospital inpatients. *Cochrane Database Syst Rev* 2013;4:CD003543.
24. Moehring RW, Anderson DJ, Cochran RL, et al. Expert Consensus on Metrics to Assess the Impact of Patient-Level Antimicrobial Stewardship Interventions in Acute-Care Settings. *Clin Infect Dis* 2017;64:377-83.
25. Stanić Benić M, Milanic R, Monnier A, et al. Metrics for quantifying antibiotic use in the hospital setting: results from a systematic review and consensus procedure. *J Antimicrob Chemother*.
26. Monnier A, Schouten J, Le Maréchal M, et al. Quality indicators for responsible antibiotic use in the inpatient setting: a systematic review followed by an international multidisciplinary consensus procedure *J Antimicrob Chemother* 2018.
27. Meeker D, Linder JA, Fox CR, et al. Effect of Behavioral Interventions on Inappropriate Antibiotic Prescribing Among Primary Care Practices: A Randomized Clinical Trial. *JAMA* 2016;315:562-70.
28. Ivers N, Jamtvedt G, Flottorp S, et al. Audit and feedback: effects on professional practice and healthcare outcomes. *Cochrane Database Syst Rev* 2012:CD000259.
29. Dik JW, Hendrix R, Poelman R, et al. Measuring the impact of antimicrobial stewardship programs. *Expert Rev Anti Infect Ther* 2016;14:569-75.
30. Morris AM, Brener S, Dresser L, et al. Use of a structured panel process to define quality metrics for antimicrobial stewardship programs. *Infect Control Hosp Epidemiol* 2012;33:500-6.
31. Morris AM. Antimicrobial Stewardship Programs: Appropriate Measures and Metrics to Study their Impact. *Curr Treat Options Infect Dis* 2014;6:101-12.
32. report Et. Proposals for EU guidelines on the prudent use of antimicrobials in humans. 2017. <https://ecdc.europa.eu/en/publications-data/proposals-eu-guidelines-prudent-use-antimicrobials-humans> (accessed February 27<sup>th</sup>, 2018).
33. Akpan MR, Ahmad R, Shebl NA, et al. A Review of Quality Measures for Assessing the Impact of Antimicrobial Stewardship Programs in Hospitals. *Antibiotics (Basel)* 2016;5.

- 1  
2  
3 34. Ibrahim NH, Maruan K, Mohd Khairy HA, et al. Economic Evaluations on  
4 Antimicrobial Stewardship Programme: A Systematic Review. *J Pharm Pharm Sci*  
5 2017;20:397-406.  
6 35. Schmitt S, McQuillen DP, Nahass R, et al. Infectious diseases specialty intervention is  
7 associated with decreased mortality and lower healthcare costs. *Clin Infect Dis* 2014;58:22-  
8 8.  
9 36. Polk RE, Hohmann SF, Medvedev S, et al. Benchmarking risk-adjusted adult  
10 antibacterial drug use in 70 US academic medical center hospitals. *Clin Infect Dis*  
11 2011;53:1100-10.  
12  
13  
14  
15  
16  
17  
18  
19  
20  
21  
22  
23  
24  
25  
26  
27  
28  
29  
30  
31  
32  
33  
34  
35  
36  
37  
38  
39  
40  
41  
42  
43  
44  
45  
46  
47  
48  
49  
50  
51  
52  
53  
54  
55  
56  
57  
58  
59  
60



## AUTHORS' CONTRIBUTIONS

BDH conceived the original idea for this study, which was further developed with all authors. BDH, EB, SH, LK and RM secured funding for the study. BDH and GC wrote the first draft of this manuscript. MdK provided input regarding the sample size calculations and statistical analysis. The manuscript was reviewed and edited by all authors: MdK, BWS, RV, SH, LK, LE, RM, EB.

## FUNDING STATEMENT

This work is supported by the Swiss National Science Foundation (grant number 407240\_167079) in the context of the Swiss National Research Programme 72 "Antimicrobial Resistance" ([www.nfp72.ch](http://www.nfp72.ch)).

## COMPETING INTERESTS STATEMENT

All authors declare no competing interests.

## ACKNOWLEDGMENT

We would like to thank all members of the COMPASS study team for the valuable contribution in setting up the study. The COMPASS study team consists of members from Geneva University Hospitals and of the Ente Ospedaliero Cantonale : Carlo Balmelli; Nicolò Centemero; Valentina Coray; Serge Da Silva; Emmanuel Durand; Christophe Marti; Lorenzo Moja; Francesco Pagnamenta; Marie-Françoise Piuz; Javier Portela; Virginie Prendki; Jérôme Stirnemann; Nathalie Vernaz.

**Table 1. Inclusion and exclusion criteria**

|                              | <b>Inclusion criteria</b>                                                                                                                  | <b>Exclusion criteria</b>                                                                                                                                                                                                                                                                 |
|------------------------------|--------------------------------------------------------------------------------------------------------------------------------------------|-------------------------------------------------------------------------------------------------------------------------------------------------------------------------------------------------------------------------------------------------------------------------------------------|
| <b>Cluster level [wards]</b> | <ul style="list-style-type: none"> <li>• Acute-care wards with at least 150 admissions/year</li> <li>• Use of CPOE</li> </ul>              | <ul style="list-style-type: none"> <li>• Emergency room(s)</li> <li>• Outpatient clinics</li> <li>• Overflow wards</li> <li>• Absence of a “matchable” ward regarding specialty and baseline antibiotic use</li> <li>• Hematopoietic stem cell transplant wards</li> <li>• ICU</li> </ul> |
| <b>Physician level</b>       | <ul style="list-style-type: none"> <li>• All physicians involved in antibiotic prescribing decisions in the participating wards</li> </ul> | <ul style="list-style-type: none"> <li>• None</li> </ul>                                                                                                                                                                                                                                  |
| <b>Patient level</b>         | <ul style="list-style-type: none"> <li>• All patients hospitalized in the participating wards</li> </ul>                                   | <ul style="list-style-type: none"> <li>• None</li> </ul>                                                                                                                                                                                                                                  |

**CPOE:** computerized physician order entry

1  
2  
3  
4  
5  
6  
7  
8  
9  
10  
11  
12  
13  
14  
15  
16  
17  
18  
19  
20  
21  
22  
23  
24  
25  
26  
27  
28  
29  
30  
31  
32  
33  
34  
35  
36  
37  
38  
39  
40  
41  
42  
43  
44  
45  
46  
47

**Table 2. Main study outcomes and corresponding hypotheses evaluated within the COMPASS trial**

|                                                                       | <b>Outcome component</b>                                                                                                                                                                                                                                | <b>Relevant hypothesis</b><br><br>(If not otherwise stated the hypothesis refers to the expected effect of the intervention) | <b>Rationale for outcome selection</b>                                                                                                                                                                                                                                                                                                                                                                                                                                                                       |
|-----------------------------------------------------------------------|---------------------------------------------------------------------------------------------------------------------------------------------------------------------------------------------------------------------------------------------------------|------------------------------------------------------------------------------------------------------------------------------|--------------------------------------------------------------------------------------------------------------------------------------------------------------------------------------------------------------------------------------------------------------------------------------------------------------------------------------------------------------------------------------------------------------------------------------------------------------------------------------------------------------|
| <b>Primary outcome</b>                                                | Days of therapy (DOT) of antibiotics <sup>a</sup> per admission                                                                                                                                                                                         | Reduction in antibiotic use through shortening of duration of treatment and reduction in combination therapies               | DOT is an easily measurable objectively assessable outcome that is supported by expert consensus.[24] Admission was chosen as the denominator for the primary outcome rather than patient-days since reductions in antimicrobial treatment duration (reflected by a reduction in DOT) may induce a reduction of length of stay (LOS). This may have as consequence that DOT per patient-days changes little despite a reduction in antibiotic exposure since both the numerator and denominator are reduced. |
| <b>Secondary outcomes: quantitative antimicrobial use<sup>b</sup></b> | DOT per 100 patient-days (PD)<br><br>Defined Daily Doses (DDD) per 100 PD and per admission<br><br>Antimicrobial days (AD) <sup>c</sup> per 100 PD and per admission<br><br>Days per treatment period overall and for specific indications <sup>d</sup> | Reduction in antimicrobial use through shortening of duration of treatment and reduction in combination therapies            | Defined daily doses (DDD) are the most widely used metric for antimicrobial consumption and are therefore most suitable for comparisons with other settings. Antimicrobial days (AD) are a further metric that has been proposed to assess antibiotic use. Both patient-days and admissions have been proposed as denominators.[24, 29-32]<br><br>A treatment period is defined as antibiotic treatment not interrupted by more than one calendar day or discharge                                           |
| <b>Secondary outcomes: clinical outcomes</b>                          | 30 day-mortality                                                                                                                                                                                                                                        | The intervention is safe and does not result in an increase in mortality or                                                  | Clinical outcomes are included to demonstrate the safety of the intervention, the improvement of quality of care and the absence of unintended consequences. The clinical outcomes                                                                                                                                                                                                                                                                                                                           |

|                                                          |                                                                                                                                                                               |                                                                                       |                                                                                                                                                                                                                                                                                                                                                                                                                                                                                                                                                                                                                                                                                                           |
|----------------------------------------------------------|-------------------------------------------------------------------------------------------------------------------------------------------------------------------------------|---------------------------------------------------------------------------------------|-----------------------------------------------------------------------------------------------------------------------------------------------------------------------------------------------------------------------------------------------------------------------------------------------------------------------------------------------------------------------------------------------------------------------------------------------------------------------------------------------------------------------------------------------------------------------------------------------------------------------------------------------------------------------------------------------------------|
|                                                          | In hospital mortality                                                                                                                                                         | readmissions                                                                          | are chosen based on their objectivity, the ease of obtaining the data and expert consensus. [29, 33]                                                                                                                                                                                                                                                                                                                                                                                                                                                                                                                                                                                                      |
|                                                          | Unplanned hospital readmissions within 30 days after discharge                                                                                                                |                                                                                       |                                                                                                                                                                                                                                                                                                                                                                                                                                                                                                                                                                                                                                                                                                           |
|                                                          | Hospital length of stay                                                                                                                                                       | Similar length of stay or a reduction in the length of stay                           |                                                                                                                                                                                                                                                                                                                                                                                                                                                                                                                                                                                                                                                                                                           |
|                                                          | Intensive or intermediate care unit admission from COMPASS wards                                                                                                              | No increase in the number of intensive care unit or intermediate care unit admissions |                                                                                                                                                                                                                                                                                                                                                                                                                                                                                                                                                                                                                                                                                                           |
| <b>Secondary outcomes: qualitative antimicrobial use</b> | Concordance of empirical antibiotic therapy with local guidelines (taking into account justified exceptions) with regard to the choice of molecules and duration of treatment | Improved quality of antimicrobial use                                                 | Improving the quality of antimicrobial use is one of the key goals of antimicrobial stewardship (AMS). Valid, reliable and universally accepted metrics for measuring appropriateness of antimicrobial use are difficult to define and labour-intensive to assess.[31] Qualitative antimicrobial use outcomes will be assessed through manual review of a random selection of charts (at least 50 charts per ward over the 12 months period) by infectious diseases specialists using pre-specified criteria for appropriateness. A sub-selection of charts (about 10% of the sample) will be reviewed independently by 2 reviewers (blinded to ward assignment) to determine inter-observer variability. |
|                                                          | Switch to oral therapy when appropriate                                                                                                                                       |                                                                                       |                                                                                                                                                                                                                                                                                                                                                                                                                                                                                                                                                                                                                                                                                                           |
|                                                          | De-escalation of antimicrobial therapy by calendar day 4 of treatment                                                                                                         |                                                                                       |                                                                                                                                                                                                                                                                                                                                                                                                                                                                                                                                                                                                                                                                                                           |
|                                                          | Appropriate diagnostic                                                                                                                                                        |                                                                                       |                                                                                                                                                                                                                                                                                                                                                                                                                                                                                                                                                                                                                                                                                                           |

1  
2  
3  
4  
5  
6  
7  
8  
9  
10  
11  
12  
13  
14  
15  
16  
17  
18  
19  
20  
21  
22  
23  
24  
25  
26  
27  
28  
29  
30  
31  
32  
33  
34  
35  
36  
37  
38  
39  
40  
41  
42  
43  
44  
45  
46  
47

|                                                                                                                                                                                                                                                                                                         | exams                                                                                                                                                                                                                                                                                                                  |                                                                                                                                               |                                                                                                                                                                                                                                                                                                                                                                                                                                                                |
|---------------------------------------------------------------------------------------------------------------------------------------------------------------------------------------------------------------------------------------------------------------------------------------------------------|------------------------------------------------------------------------------------------------------------------------------------------------------------------------------------------------------------------------------------------------------------------------------------------------------------------------|-----------------------------------------------------------------------------------------------------------------------------------------------|----------------------------------------------------------------------------------------------------------------------------------------------------------------------------------------------------------------------------------------------------------------------------------------------------------------------------------------------------------------------------------------------------------------------------------------------------------------|
| <b>Secondary outcomes: microbiologic outcomes and healthcare associated infections</b>                                                                                                                                                                                                                  | <p>Incidence of healthcare facility onset <i>Clostridium difficile</i> denominated per 10 000 PD and admission (attributed to unit)</p> <p>Incident clinical cultures with multi-drug resistant organisms (MRSA, ESBL-E, CPE, VRE, multidrug resistant <i>P. aeruginosa</i>) denominated per 1000 PD and admission</p> | <p>Reduced incidence of healthcare facility onset <i>C. difficile</i> infection</p> <p>Reduced incidence of multidrug-resistant organisms</p> | <p>Limiting <i>Clostridium difficile</i> infections (CDI) and the emergence and transmission of AMR is one of the key goals of AMS. There is expert consensus that the incidence of CDI and drug-resistant pathogens are key metrics to assess the impact of AMS.[24]</p> <p>Since these outcomes are influenced by numerous other factors and would require a very large sample size, they are secondary outcomes and not primary outcomes in this study.</p> |
| <b>Secondary outcomes physician satisfaction</b>                                                                                                                                                                                                                                                        | User satisfaction with the system                                                                                                                                                                                                                                                                                      | Users will be satisfied with the system                                                                                                       | A major obstacle to the use of CDSS is the lack of buy-in from prescribers and unintended consequences such as “alert fatigue”.                                                                                                                                                                                                                                                                                                                                |
| <b>Secondary outcomes: economic</b>                                                                                                                                                                                                                                                                     | <p>Costs of administered antimicrobials (overall and by class) per admission and per admission receiving antibiotics</p> <p>Costs of the intervention</p> <p>Total costs of hospitalisation</p>                                                                                                                        | Decreased overall direct costs for antimicrobials                                                                                             | Reducing the cost of antimicrobial therapy is a goal secondary to that of improving quality of care and patient safety but is one of great interest to administrators.[34] All costs will be assessed from the perspective of the hospital.                                                                                                                                                                                                                    |
| <b>Other outcomes</b>                                                                                                                                                                                                                                                                                   | Number of infectious diseases consultations                                                                                                                                                                                                                                                                            | No difference in the number of infectious diseases consultations between the groups                                                           | An unintended consequence of the intervention may be an increase in the requests for infectious diseases consultations which may impact antibiotic use and patient outcomes.[35]                                                                                                                                                                                                                                                                               |
| <p><sup>a</sup> The primary outcome will be DOT for antibiotics belonging to Anatomical Therapeutic Chemical (ATC) Classification System class J01 (anti-infectives for systemic use) plus oral metronidazole (P01AB01), oral vancomycin (A07AA09), rifampicin (J04AB02) and fidaxomicin (A07AA12).</p> |                                                                                                                                                                                                                                                                                                                        |                                                                                                                                               |                                                                                                                                                                                                                                                                                                                                                                                                                                                                |

<sup>b</sup> In addition to overall antibiotic use as defined above, outcomes for DOT and DDD will also be assessed for different antibiotic classes, for antifungals, for non-HIV antivirals and for selected specific antibiotics.

<sup>c</sup> The metric “Antimicrobial day” (AD) is equivalent to “Length of Therapy” (LOT)[36]

<sup>d</sup> To make a comparison possible between intervention and control wards the “diagnosis” will be based on administrative discharge data. The most common infections (Community acquired pneumonia, upper urinary tract infection etc.) will be analyzed.

CPE : carbapenemase-producing *Enterobacteriaceae*; ESBL-E : extended-spectrum beta-lactamase producing *Enterobacteriaceae*; MRSA : methicillin-resistant *Staphylococcus aureus*; VRE: vancomycin-resistant enterococci.

1  
2  
3  
4  
5  
6  
7  
8  
9  
10  
11  
12  
13  
14  
15  
16  
17  
18  
19  
20  
21  
22  
23  
24  
25  
26  
27  
28  
29  
30  
31  
32  
33  
34  
35  
36  
37  
38  
39  
40  
41  
42  
43  
44  
45  
46  
47

### Figure 1: COMPASS interventions

Legend: (1) Decision support for antimicrobial treatment will be provided when physician prescribes systemic antimicrobial agent (including antifungals & antivirals except antiretroviral drugs used for the treatment of HIV) in the CPOE. (2) On the fourth calendar day of antimicrobial treatment, a visual electronic alert displayed in the patient's electronic medical chart will remind prescribers to reassess treatment with regard to intravenous-oral switch, de-escalation or stopping therapy. (3) At the time of re-evaluation, the guideline-concordant duration will be automatically proposed. If this duration is exceeded, a justification will have to be provided. (4) All physicians on a given intervention ward will receive monthly e-mails outlining the performance of the ward compared to the other participating wards and compared to the guideline recommendation.

### Figure 2: Randomisation scheme

Legend: Twenty-four acute-wards fulfilling the inclusion criteria will be recruited (16 wards at HUG, 4 wards at ORL and OSG each). Acute wards will be paired according to centre, specialty (e.g., medicine, surgery, geriatrics), and baseline antibiotic use in days of therapy (DOT)/admission. Wards will be randomised 1:1 to the intervention or control arm within each pair using an online random sequence generator.

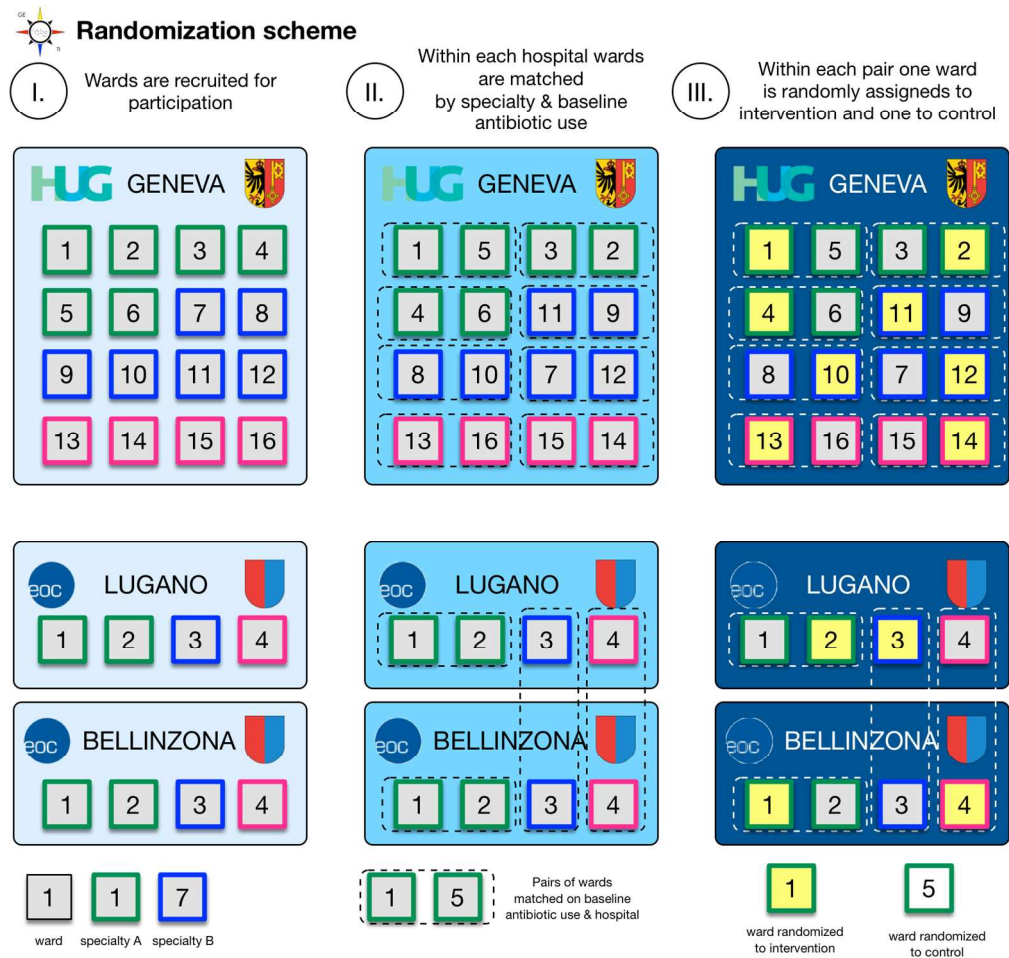

Figure 2: Randomisation scheme.

Legend: Twenty-four acute-wards fulfilling the inclusion criteria will be recruited (16 wards at HUG, 4 wards at ORL and OSG each). Acute wards will be paired according to centre, specialty (e.g., medicine, surgery, geriatrics), and baseline antibiotic use in days of therapy (DOT)/admission. Wards will be randomised 1:1 to the intervention or control arm within each pair using an online random sequence generator.



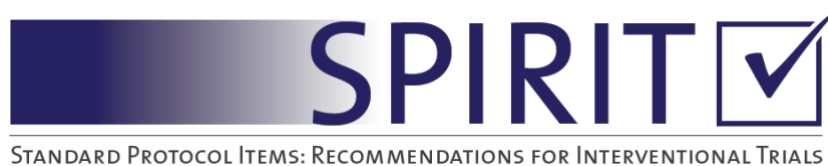

STANDARD PROTOCOL ITEMS: RECOMMENDATIONS FOR INTERVENTIONAL TRIALS

SPIRIT 2013 Checklist: Recommended items to address in a clinical trial protocol and related documents\*

| Section/item                      | Item No | Description                                                                                                                                                                                                                                                                              | Reported on page /line No<br>(NA: not applicable) |
|-----------------------------------|---------|------------------------------------------------------------------------------------------------------------------------------------------------------------------------------------------------------------------------------------------------------------------------------------------|---------------------------------------------------|
| <b>Administrative information</b> |         |                                                                                                                                                                                                                                                                                          |                                                   |
| Title                             | 1       | Descriptive title identifying the study design, population, interventions, and, if applicable, trial acronym                                                                                                                                                                             | Page 1                                            |
| Trial registration                | 2a      | Trial identifier and registry name. If not yet registered, name of intended registry                                                                                                                                                                                                     | Page 2                                            |
|                                   | 2b      | All items from the World Health Organization Trial Registration Data Set                                                                                                                                                                                                                 | NA                                                |
| Protocol version                  | 3       | Date and version identifier                                                                                                                                                                                                                                                              |                                                   |
| Funding                           | 4       | Sources and types of financial, material, and other support                                                                                                                                                                                                                              | Page 15/line 21-23                                |
| Roles and responsibilities        | 5a      | Names, affiliations, and roles of protocol contributors                                                                                                                                                                                                                                  | Page 1                                            |
|                                   | 5b      | Name and contact information for the trial sponsor                                                                                                                                                                                                                                       | Page 1                                            |
|                                   | 5c      | Role of study sponsor and funders, if any, in study design; collection, management, analysis, and interpretation of data; writing of the report; and the decision to submit the report for publication, including whether they will have ultimate authority over any of these activities | Page 15                                           |
|                                   | 5d      | Composition, roles, and responsibilities of the coordinating centre, steering committee, endpoint adjudication committee, data management team, and other individuals or groups overseeing the trial, if applicable (see Item 21a for data monitoring committee)                         | NA                                                |

**Introduction**

|    |                                                           |     |                                                                                                                                                                                                                                                                                                                                                                                |
|----|-----------------------------------------------------------|-----|--------------------------------------------------------------------------------------------------------------------------------------------------------------------------------------------------------------------------------------------------------------------------------------------------------------------------------------------------------------------------------|
| 1  |                                                           |     |                                                                                                                                                                                                                                                                                                                                                                                |
| 2  | Background and rationale                                  | 6a  | Description of research question and justification for undertaking the trial, including summary of relevant studies (published and unpublished) examining benefits and harms for each intervention                                                                                                                                                                             |
| 3  |                                                           |     | Page 4                                                                                                                                                                                                                                                                                                                                                                         |
| 4  |                                                           |     |                                                                                                                                                                                                                                                                                                                                                                                |
| 5  |                                                           |     |                                                                                                                                                                                                                                                                                                                                                                                |
| 6  |                                                           |     |                                                                                                                                                                                                                                                                                                                                                                                |
| 7  |                                                           | 6b  | Explanation for choice of comparators                                                                                                                                                                                                                                                                                                                                          |
| 8  |                                                           |     | Page 8                                                                                                                                                                                                                                                                                                                                                                         |
| 9  | Objectives                                                | 7   | Specific objectives or hypotheses                                                                                                                                                                                                                                                                                                                                              |
| 10 |                                                           |     | Pages 5, 9                                                                                                                                                                                                                                                                                                                                                                     |
| 11 | Trial design                                              | 8   | Description of trial design including type of trial (eg, parallel group, crossover, factorial, single group), allocation ratio, and framework (eg, superiority, equivalence, noninferiority, exploratory)                                                                                                                                                                      |
| 12 |                                                           |     | Pages 5, 8, 9                                                                                                                                                                                                                                                                                                                                                                  |
| 13 |                                                           |     |                                                                                                                                                                                                                                                                                                                                                                                |
| 14 |                                                           |     |                                                                                                                                                                                                                                                                                                                                                                                |
| 15 |                                                           |     |                                                                                                                                                                                                                                                                                                                                                                                |
| 16 |                                                           |     |                                                                                                                                                                                                                                                                                                                                                                                |
| 17 |                                                           |     |                                                                                                                                                                                                                                                                                                                                                                                |
| 18 | <b>Methods: Participants, interventions, and outcomes</b> |     |                                                                                                                                                                                                                                                                                                                                                                                |
| 19 | Study setting                                             | 9   | Description of study settings (eg, community clinic, academic hospital) and list of countries where data will be collected. Reference to where list of study sites can be obtained                                                                                                                                                                                             |
| 20 |                                                           |     | Page 5                                                                                                                                                                                                                                                                                                                                                                         |
| 21 |                                                           |     |                                                                                                                                                                                                                                                                                                                                                                                |
| 22 |                                                           |     |                                                                                                                                                                                                                                                                                                                                                                                |
| 23 |                                                           |     |                                                                                                                                                                                                                                                                                                                                                                                |
| 24 |                                                           |     |                                                                                                                                                                                                                                                                                                                                                                                |
| 25 | Eligibility criteria                                      | 10  | Inclusion and exclusion criteria for participants. If applicable, eligibility criteria for study centres and individuals who will perform the interventions (eg, surgeons, psychotherapists)                                                                                                                                                                                   |
| 26 |                                                           |     | Page 8                                                                                                                                                                                                                                                                                                                                                                         |
| 27 |                                                           |     |                                                                                                                                                                                                                                                                                                                                                                                |
| 28 |                                                           |     |                                                                                                                                                                                                                                                                                                                                                                                |
| 29 |                                                           |     |                                                                                                                                                                                                                                                                                                                                                                                |
| 30 |                                                           |     |                                                                                                                                                                                                                                                                                                                                                                                |
| 31 | Interventions                                             | 11a | Interventions for each group with sufficient detail to allow replication, including how and when they will be administered                                                                                                                                                                                                                                                     |
| 32 |                                                           |     | Pages 5-7                                                                                                                                                                                                                                                                                                                                                                      |
| 33 |                                                           |     |                                                                                                                                                                                                                                                                                                                                                                                |
| 34 |                                                           |     |                                                                                                                                                                                                                                                                                                                                                                                |
| 35 |                                                           | 11b | Criteria for discontinuing or modifying allocated interventions for a given trial participant (eg, drug dose change in response to harms, participant request, or improving/worsening disease)                                                                                                                                                                                 |
| 36 |                                                           |     | NA                                                                                                                                                                                                                                                                                                                                                                             |
| 37 |                                                           |     |                                                                                                                                                                                                                                                                                                                                                                                |
| 38 |                                                           |     |                                                                                                                                                                                                                                                                                                                                                                                |
| 39 |                                                           |     |                                                                                                                                                                                                                                                                                                                                                                                |
| 40 |                                                           |     |                                                                                                                                                                                                                                                                                                                                                                                |
| 41 |                                                           | 11c | Strategies to improve adherence to intervention protocols, and any procedures for monitoring adherence (eg, drug tablet return, laboratory tests)                                                                                                                                                                                                                              |
| 42 |                                                           |     | Page 7                                                                                                                                                                                                                                                                                                                                                                         |
| 43 |                                                           |     |                                                                                                                                                                                                                                                                                                                                                                                |
| 44 |                                                           |     |                                                                                                                                                                                                                                                                                                                                                                                |
| 45 |                                                           | 11d | Relevant concomitant care and interventions that are permitted or prohibited during the trial                                                                                                                                                                                                                                                                                  |
| 46 |                                                           |     | Pages 5-6                                                                                                                                                                                                                                                                                                                                                                      |
| 47 |                                                           |     |                                                                                                                                                                                                                                                                                                                                                                                |
| 48 | Outcomes                                                  | 12  | Primary, secondary, and other outcomes, including the specific measurement variable (eg, systolic blood pressure), analysis metric (eg, change from baseline, final value, time to event), method of aggregation (eg, median, proportion), and time point for each outcome. Explanation of the clinical relevance of chosen efficacy and harm outcomes is strongly recommended |
| 49 |                                                           |     | Page 9, Table 2                                                                                                                                                                                                                                                                                                                                                                |
| 50 |                                                           |     |                                                                                                                                                                                                                                                                                                                                                                                |
| 51 |                                                           |     |                                                                                                                                                                                                                                                                                                                                                                                |
| 52 |                                                           |     |                                                                                                                                                                                                                                                                                                                                                                                |
| 53 |                                                           |     |                                                                                                                                                                                                                                                                                                                                                                                |
| 54 |                                                           |     |                                                                                                                                                                                                                                                                                                                                                                                |
| 55 |                                                           |     |                                                                                                                                                                                                                                                                                                                                                                                |
| 56 |                                                           |     |                                                                                                                                                                                                                                                                                                                                                                                |
| 57 |                                                           |     |                                                                                                                                                                                                                                                                                                                                                                                |
| 58 |                                                           |     |                                                                                                                                                                                                                                                                                                                                                                                |
| 59 |                                                           |     |                                                                                                                                                                                                                                                                                                                                                                                |
| 60 |                                                           |     |                                                                                                                                                                                                                                                                                                                                                                                |

|    |             |    |                                                      |            |
|----|-------------|----|------------------------------------------------------|------------|
| 1  |             |    |                                                      |            |
| 2  | Participant | 13 | Time schedule of enrolment, interventions (including | Pages 7, 9 |
| 3  | timeline    |    | any run-ins and washouts), assessments, and visits   |            |
| 4  |             |    | for participants. A schematic diagram is highly      |            |
| 5  |             |    | recommended (see Figure)                             |            |
| 6  |             |    |                                                      |            |
| 7  | Sample size | 14 | Estimated number of participants needed to achieve   | Page 8     |
| 8  |             |    | study objectives and how it was determined,          |            |
| 9  |             |    | including clinical and statistical assumptions       |            |
| 10 |             |    | supporting any sample size calculations              |            |
| 11 |             |    |                                                      |            |
| 12 |             |    |                                                      |            |
| 13 | Recruitment | 15 | Strategies for achieving adequate participant        | Page 8     |
| 14 |             |    | enrolment to reach target sample size                |            |
| 15 |             |    |                                                      |            |

### Methods: Assignment of interventions (for controlled trials)

#### Allocation:

|    |               |     |                                                          |                     |
|----|---------------|-----|----------------------------------------------------------|---------------------|
| 20 | Sequence      | 16a | Method of generating the allocation sequence (eg,        | Page 8 and figure 2 |
| 21 | generation    |     | computer-generated random numbers), and list of          |                     |
| 22 |               |     | any factors for stratification. To reduce predictability |                     |
| 23 |               |     | of a random sequence, details of any planned             |                     |
| 24 |               |     | restriction (eg, blocking) should be provided in a       |                     |
| 25 |               |     | separate document that is unavailable to those who       |                     |
| 26 |               |     | enrol participants or assign interventions               |                     |
| 27 |               |     |                                                          |                     |
| 28 |               |     |                                                          |                     |
| 29 |               |     |                                                          |                     |
| 30 | Allocation    | 16b | Mechanism of implementing the allocation sequence        | Page 8              |
| 31 | concealment   |     | (eg, central telephone; sequentially numbered,           |                     |
| 32 | mechanism     |     | opaque, sealed envelopes), describing any steps to       |                     |
| 33 |               |     | conceal the sequence until interventions are             |                     |
| 34 |               |     | assigned                                                 |                     |
| 35 |               |     |                                                          |                     |
| 36 |               |     |                                                          |                     |
| 37 | Implementatio | 16c | Who will generate the allocation sequence, who will      | Page 8              |
| 38 | n             |     | enrol participants, and who will assign participants     |                     |
| 39 |               |     | to interventions                                         |                     |
| 40 |               |     |                                                          |                     |
| 41 | Blinding      | 17a | Who will be blinded after assignment to                  | Page 9              |
| 42 | (masking)     |     | interventions (eg, trial participants, care providers,   |                     |
| 43 |               |     | outcome assessors, data analysts), and how               |                     |
| 44 |               |     |                                                          |                     |
| 45 |               | 17b | If blinded, circumstances under which unblinding is      | NA                  |
| 46 |               |     | permissible, and procedure for revealing a               |                     |
| 47 |               |     | participant's allocated intervention during the trial    |                     |
| 48 |               |     |                                                          |                     |
| 49 |               |     |                                                          |                     |

### Methods: Data collection, management, and analysis

|    |                            |     |                                                           |         |
|----|----------------------------|-----|-----------------------------------------------------------|---------|
| 1  |                            |     |                                                           |         |
| 2  | Data collection            | 18a | Plans for assessment and collection of outcome,           | Page 10 |
| 3  | methods                    |     | baseline, and other trial data, including any related     |         |
| 4  |                            |     | processes to promote data quality (eg, duplicate          |         |
| 5  |                            |     | measurements, training of assessors) and a                |         |
| 6  |                            |     | description of study instruments (eg, questionnaires,     |         |
| 7  |                            |     | laboratory tests) along with their reliability and        |         |
| 8  |                            |     | validity, if known. Reference to where data collection    |         |
| 9  |                            |     | forms can be found, if not in the protocol                |         |
| 10 |                            |     |                                                           |         |
| 11 |                            |     |                                                           |         |
| 12 |                            | 18b | Plans to promote participant retention and complete       | NA      |
| 13 |                            |     | follow-up, including list of any outcome data to be       |         |
| 14 |                            |     | collected for participants who discontinue or deviate     |         |
| 15 |                            |     | from intervention protocols                               |         |
| 16 |                            |     |                                                           |         |
| 17 |                            |     |                                                           |         |
| 18 | Data                       | 19  | Plans for data entry, coding, security, and storage,      | Page 10 |
| 19 | management                 |     | including any related processes to promote data           |         |
| 20 |                            |     | quality (eg, double data entry; range checks for data     |         |
| 21 |                            |     | values). Reference to where details of data               |         |
| 22 |                            |     | management procedures can be found, if not in the         |         |
| 23 |                            |     | protocol                                                  |         |
| 24 |                            |     |                                                           |         |
| 25 |                            |     |                                                           |         |
| 26 | Statistical                | 20a | Statistical methods for analysing primary and             | Page 10 |
| 27 | methods                    |     | secondary outcomes. Reference to where other              |         |
| 28 |                            |     | details of the statistical analysis plan can be found, if |         |
| 29 |                            |     | not in the protocol                                       |         |
| 30 |                            |     |                                                           |         |
| 31 |                            |     |                                                           |         |
| 32 |                            | 20b | Methods for any additional analyses (eg, subgroup         | NA      |
| 33 |                            |     | and adjusted analyses)                                    |         |
| 34 |                            |     |                                                           |         |
| 35 |                            | 20c | Definition of analysis population relating to protocol    | NA      |
| 36 |                            |     | non-adherence (eg, as randomised analysis), and           |         |
| 37 |                            |     | any statistical methods to handle missing data (eg,       |         |
| 38 |                            |     | multiple imputation)                                      |         |
| 39 |                            |     |                                                           |         |
| 40 |                            |     |                                                           |         |
| 41 | <b>Methods: Monitoring</b> |     |                                                           |         |
| 42 |                            |     |                                                           |         |
| 43 | Data monitoring            | 21a | Composition of data monitoring committee (DMC);           | NA      |
| 44 |                            |     | summary of its role and reporting structure;              |         |
| 45 |                            |     | statement of whether it is independent from the           |         |
| 46 |                            |     | sponsor and competing interests; and reference to         |         |
| 47 |                            |     | where further details about its charter can be found,     |         |
| 48 |                            |     | if not in the protocol. Alternatively, an explanation of  |         |
| 49 |                            |     | why a DMC is not needed                                   |         |
| 50 |                            |     |                                                           |         |
| 51 |                            |     |                                                           |         |
| 52 |                            | 21b | Description of any interim analyses and stopping          | NA      |
| 53 |                            |     | guidelines, including who will have access to these       |         |
| 54 |                            |     | interim results and make the final decision to            |         |
| 55 |                            |     | terminate the trial                                       |         |
| 56 |                            |     |                                                           |         |
| 57 |                            |     |                                                           |         |
| 58 |                            |     |                                                           |         |
| 59 |                            |     |                                                           |         |
| 60 |                            |     |                                                           |         |

|    |                                 |     |                                                          |             |
|----|---------------------------------|-----|----------------------------------------------------------|-------------|
| 1  |                                 |     |                                                          |             |
| 2  | Harms                           | 22  | Plans for collecting, assessing, reporting, and          | NA          |
| 3  |                                 |     | managing solicited and spontaneously reported            |             |
| 4  |                                 |     | adverse events and other unintended effects of trial     |             |
| 5  |                                 |     | interventions or trial conduct                           |             |
| 6  |                                 |     |                                                          |             |
| 7  | Auditing                        | 23  | Frequency and procedures for auditing trial conduct,     | NA          |
| 8  |                                 |     | if any, and whether the process will be independent      |             |
| 9  |                                 |     | from investigators and the sponsor                       |             |
| 10 |                                 |     |                                                          |             |
| 11 |                                 |     |                                                          |             |
| 12 | <b>Ethics and dissemination</b> |     |                                                          |             |
| 13 |                                 |     |                                                          |             |
| 14 | Research ethics                 | 24  | Plans for seeking research ethics                        | Pages 10-11 |
| 15 | approval                        |     | committee/institutional review board (REC/IRB)           |             |
| 16 |                                 |     | approval                                                 |             |
| 17 |                                 |     |                                                          |             |
| 18 | Protocol                        | 25  | Plans for communicating important protocol               | NA          |
| 19 | amendments                      |     | modifications (eg, changes to eligibility criteria,      |             |
| 20 |                                 |     | outcomes, analyses) to relevant parties (eg,             |             |
| 21 |                                 |     | investigators, REC/IRBs, trial participants, trial       |             |
| 22 |                                 |     | registries, journals, regulators)                        |             |
| 23 |                                 |     |                                                          |             |
| 24 |                                 |     |                                                          |             |
| 25 | Consent or                      | 26a | Who will obtain informed consent or assent from          | Page 10     |
| 26 | assent                          |     | potential trial participants or authorised surrogates,   |             |
| 27 |                                 |     | and how (see Item 32)                                    |             |
| 28 |                                 |     |                                                          |             |
| 29 |                                 |     |                                                          |             |
| 30 |                                 | 26b | Additional consent provisions for collection and use     | NA          |
| 31 |                                 |     | of participant data and biological specimens in          |             |
| 32 |                                 |     | ancillary studies, if applicable                         |             |
| 33 |                                 |     |                                                          |             |
| 34 | Confidentiality                 | 27  | How personal information about potential and             | Page 10     |
| 35 |                                 |     | enrolled participants will be collected, shared, and     |             |
| 36 |                                 |     | maintained in order to protect confidentiality before,   |             |
| 37 |                                 |     | during, and after the trial                              |             |
| 38 |                                 |     |                                                          |             |
| 39 |                                 |     |                                                          |             |
| 40 | Declaration of                  | 28  | Financial and other competing interests for principal    | Page 15     |
| 41 | interests                       |     | investigators for the overall trial and each study site  |             |
| 42 |                                 |     |                                                          |             |
| 43 | Access to data                  | 29  | Statement of who will have access to the final trial     | Page 10     |
| 44 |                                 |     | dataset, and disclosure of contractual agreements        |             |
| 45 |                                 |     | that limit such access for investigators                 |             |
| 46 |                                 |     |                                                          |             |
| 47 |                                 |     |                                                          |             |
| 48 | Ancillary and                   | 30  | Provisions, if any, for ancillary and post-trial care,   | NA          |
| 49 | post-trial care                 |     | and for compensation to those who suffer harm from       |             |
| 50 |                                 |     | trial participation                                      |             |
| 51 |                                 |     |                                                          |             |
| 52 | Dissemination                   | 31a | Plans for investigators and sponsor to communicate       | Pages 10-11 |
| 53 | policy                          |     | trial results to participants, healthcare professionals, |             |
| 54 |                                 |     | the public, and other relevant groups (eg, via           |             |
| 55 |                                 |     | publication, reporting in results databases, or other    |             |
| 56 |                                 |     | data sharing arrangements), including any                |             |
| 57 |                                 |     | publication restrictions                                 |             |
| 58 |                                 |     |                                                          |             |
| 59 |                                 |     |                                                          |             |
| 60 |                                 |     |                                                          |             |

- 1  
2  
3  
4  
5  
6  
7  
8  
9
- |     |                                                                                                                 |         |
|-----|-----------------------------------------------------------------------------------------------------------------|---------|
| 31b | Authorship eligibility guidelines and any intended use of professional writers                                  | Page 15 |
| 31c | Plans, if any, for granting public access to the full protocol, participant-level dataset, and statistical code |         |

## 10 Appendices

- 11  
12  
13  
14  
15  
16  
17  
18  
19  
20  
21
- |                            |    |                                                                                                                                                                                                |    |
|----------------------------|----|------------------------------------------------------------------------------------------------------------------------------------------------------------------------------------------------|----|
| Informed consent materials | 32 | Model consent form and other related documentation given to participants and authorised surrogates                                                                                             | NA |
| Biological specimens       | 33 | Plans for collection, laboratory evaluation, and storage of biological specimens for genetic or molecular analysis in the current trial and for future use in ancillary studies, if applicable | NA |

---

22 \*It is strongly recommended that this checklist be read in conjunction with the SPIRIT 2013  
23 Explanation & Elaboration for important clarification on the items. Amendments to the  
24 protocol should be tracked and dated. The SPIRIT checklist is copyrighted by the SPIRIT  
25 Group under the Creative Commons "[Attribution-NonCommercial-NoDerivs 3.0 Unported](https://creativecommons.org/licenses/by-nc-nd/3.0/)"  
26 license.  
27  
28  
29  
30  
31  
32  
33  
34  
35  
36  
37  
38  
39  
40  
41  
42  
43  
44  
45  
46  
47  
48  
49  
50  
51  
52  
53  
54  
55  
56  
57  
58  
59  
60

# BMJ Open

## A study protocol for a multicentre, cluster-randomised, superiority trial evaluating the impact of computerized decision support, audit and feedback on antibiotic use: The Computerized Antibiotic Stewardship Study (COMPASS)

|                                                                                                                                                         |                                                                                                                                                                                                                                                                                                                                                                                                                                                                                                                                                                                                                                                                                                                                                                                                                                                                                                                                                                                                                                                                                                                     |
|---------------------------------------------------------------------------------------------------------------------------------------------------------|---------------------------------------------------------------------------------------------------------------------------------------------------------------------------------------------------------------------------------------------------------------------------------------------------------------------------------------------------------------------------------------------------------------------------------------------------------------------------------------------------------------------------------------------------------------------------------------------------------------------------------------------------------------------------------------------------------------------------------------------------------------------------------------------------------------------------------------------------------------------------------------------------------------------------------------------------------------------------------------------------------------------------------------------------------------------------------------------------------------------|
| Journal:                                                                                                                                                | <i>BMJ Open</i>                                                                                                                                                                                                                                                                                                                                                                                                                                                                                                                                                                                                                                                                                                                                                                                                                                                                                                                                                                                                                                                                                                     |
| Manuscript ID                                                                                                                                           | bmjopen-2018-022666.R1                                                                                                                                                                                                                                                                                                                                                                                                                                                                                                                                                                                                                                                                                                                                                                                                                                                                                                                                                                                                                                                                                              |
| Article Type:                                                                                                                                           | Protocol                                                                                                                                                                                                                                                                                                                                                                                                                                                                                                                                                                                                                                                                                                                                                                                                                                                                                                                                                                                                                                                                                                            |
| Date Submitted by the Author:                                                                                                                           | 22-Mar-2018                                                                                                                                                                                                                                                                                                                                                                                                                                                                                                                                                                                                                                                                                                                                                                                                                                                                                                                                                                                                                                                                                                         |
| Complete List of Authors:                                                                                                                               | Catho, Gaud; Geneva University Hospital and Faculty of Medicine, Division of Infectious Diseases<br>de Kraker, Marlieke; Geneva University Hospital and Faculty of Medicine, Infection Control Program<br>Waldispühl Suter, Brigitte; Ente Ospedaliero Cantonale, Division of clinical informatics<br>Valotti, Roberta; Ospedale Regionale di Lugano, Ente Ospedaliero Cantonale, Division of Infectious Diseases<br>Harbarth, Stephan; Geneva University Hospital and Faculty of Medicine, Infection Control Program; Geneva University Hospital and Faculty of Medicine, Division of Infectious Diseases<br>Kaiser, Laurent; Geneva University Hospital and Faculty of Medicine, Division of Infectious Diseases<br>Elzi, Luigia; Ospedale San Giovanni, Ente Ospedaliero Cantonale, Division of Infectious Diseases<br>Meyer, Rodolphe; Geneva University Hospital, Division of informatics<br>Bernasconi, Enos; Ospedale Regionale di Lugano, Ente Ospedaliero Cantonale, Division of Infectious Diseases<br>Huttner, Benedikt D; Geneva University Hospital and Faculty of Medicine, Infection Control Program |
| <b>Primary Subject Heading</b>:                                                                                                                         | Infectious diseases                                                                                                                                                                                                                                                                                                                                                                                                                                                                                                                                                                                                                                                                                                                                                                                                                                                                                                                                                                                                                                                                                                 |
| Secondary Subject Heading:                                                                                                                              | Health informatics                                                                                                                                                                                                                                                                                                                                                                                                                                                                                                                                                                                                                                                                                                                                                                                                                                                                                                                                                                                                                                                                                                  |
| Keywords:                                                                                                                                               | antimicrobial stewardship, computerized decision support system, cluster-randomised trial                                                                                                                                                                                                                                                                                                                                                                                                                                                                                                                                                                                                                                                                                                                                                                                                                                                                                                                                                                                                                           |
| Note: The following files were submitted by the author for peer review, but cannot be converted to PDF. You must view these files (e.g. movies) online. |                                                                                                                                                                                                                                                                                                                                                                                                                                                                                                                                                                                                                                                                                                                                                                                                                                                                                                                                                                                                                                                                                                                     |
| Figure_1 (34).jpg                                                                                                                                       |                                                                                                                                                                                                                                                                                                                                                                                                                                                                                                                                                                                                                                                                                                                                                                                                                                                                                                                                                                                                                                                                                                                     |

1  
2  
3  
4  
5  
6  
7  
8  
9  
10  
11  
12  
13  
14  
15  
16  
17  
18  
19  
20  
21  
22  
23  
24  
25  
26  
27  
28  
29  
30  
31  
32  
33  
34  
35  
36  
37  
38  
39  
40  
41  
42  
43  
44  
45  
46  
47  
48  
49  
50  
51  
52  
53  
54  
55  
56  
57  
58  
59  
60

SCHOLARONE™  
Manuscripts

For peer review only



1  
2  
3  
4 **A study protocol for a multicentre, cluster-randomised,**  
5 **superiority trial evaluating the impact of computerized**  
6 **decision support, audit and feedback on antibiotic use:**  
7 **The Computerized Antibiotic Stewardship Study**  
8 **(COMPASS)**  
9

10  
11  
12 **AUTHORS AND AFFILIATIONS**  
13

14 Gaud Catho<sup>1</sup>, Marlieke De Kraker<sup>2</sup>, Brigitte Waldispühl Suter<sup>3</sup>, Roberta Valotti<sup>4</sup>, Stephan  
15 Harbarth<sup>1,2</sup>, Laurent Kaiser<sup>1</sup>, Luigia Elzi<sup>5</sup>, Rodolphe Meyer<sup>6</sup>, Enos Bernasconi<sup>4</sup>, Benedikt D.  
16 Huttner<sup>1,2</sup>  
17  
18  
19

20  
21 <sup>1</sup>Division of Infectious Diseases, Geneva University Hospital and Faculty of Medicine,  
22 Geneva, Switzerland  
23

24 <sup>2</sup>Infection Control Program, Geneva University Hospital and Faculty of Medicine, Geneva,  
25 Switzerland  
26  
27

28 <sup>3</sup> Division of clinical informatics, Ente Ospedaliero Cantonale, Bellinzona, Switzerland  
29

30 <sup>4</sup>Division of Infectious Diseases, Ospedale Regionale di Lugano, Ente Ospedaliero Cantonale,  
31 Lugano, Switzerland  
32

33 <sup>5</sup>Division of Infectious Diseases, Ospedale San Giovanni, Ente Ospedaliero Cantonale,  
34 Bellinzona, Switzerland  
35

36 <sup>6</sup>Division of informatics, Geneva University Hospital, Geneva, Switzerland  
37  
38  
39

40 Corresponding author's email address: [catho.gaud@hcuge.ch](mailto:catho.gaud@hcuge.ch)  
41  
42  
43  
44  
45  
46  
47  
48  
49  
50  
51  
52  
53  
54  
55  
56  
57  
58  
59  
60

## ABSTRACT

**INTRODUCTION:** Inappropriate use of antimicrobials in hospitals contributes to antimicrobial resistance. Antimicrobial stewardship (AMS) interventions aim to improve antimicrobial prescribing, but they are often resource and personnel intensive. Computerized Decision Support Systems (CDSS) seem a promising tool to improve antimicrobial prescribing but have been insufficiently studied in clinical trials.

**METHODS AND ANALYSIS:** The COMPuterized Antibiotic Stewardship Study (COMPASS) trial is a publically funded, open-label, cluster-randomised, controlled superiority trial which aims to determine whether a multi-modal CDSS intervention integrated in the electronic health record (EHR) reduces overall antibiotic exposure in adult patients hospitalized in wards of two secondary and one tertiary care centre in Switzerland compared to “standard-of-care” AMS. Twenty-four hospital wards will be randomised 1:1 to either intervention or control, using a “pair-matching” approach based on baseline antibiotic use, specialty and centre. The intervention will consist of (1) decision support for the choice of antimicrobial treatment and duration of treatment for selected indications (based on indication entry), (2) accountable justification for deviation from the local guidelines (with regard to the choice of molecules and duration), (3) alerts for self-guided re-evaluation of treatment on calendar day 4 of antimicrobial therapy and (4) monthly ward-level feedback of antimicrobial prescribing indicators. The primary outcome will be the difference in overall systemic antibiotic use measured in days of therapy (DOT) per admission based on administration data recorded in the EHR over the whole intervention period (12 months), taking into account clustering. Secondary outcomes include qualitative and quantitative antimicrobial use indicators, economic outcomes and clinical, microbiological and patient safety indicators.

**ETHICS AND DISSEMINATION:** Ethics approval was obtained for all participating sites (CCER 2017-00454). The results of the trial will be submitted for publication in a peer-reviewed journal. Further dissemination activities will be presentations / posters at national and international conferences.

**TRIAL REGISTRATION NUMBER:** NCT03120975

## ARTICLE SUMMARY

### Strengths and limitations of this study

- The use of a multicentre randomised design in a research area where there is a clear lack of high-quality trials (impact: increased internal validity)
- The intervention will be tested in a diverse setting of hospitals in different cultural / language regions of the same country (impact: increased external validity) and it is relatively easy to implement uniformly (impact: increased external validity)
- Overall, antimicrobial prescribing levels in the participating centres are already relatively low compared to levels in other countries (about 50-60 Defined Daily Dose (DDD) per 100 patient-days) (impact: reduced external validity; higher risk of “negative” trial)
- While the intervention should be implementable elsewhere, it requires modifications in the EHR / CPOE system which may be difficult to implement in settings using software by commercial vendors (impact: reduced external validity)
- This is a cluster randomised trial with the ward as the “unit of randomisation”. A certain degree of “contamination” is therefore unavoidable, *e.g.* through physicians changing between wards, although the degree is lower than for an individual randomised trial (impact: higher risk of “negative” trial)

## INTRODUCTION

Inappropriate use of antimicrobials in hospitals is one of the key drivers of antimicrobial resistance (AMR) and *Clostridium difficile* infection (CDI). The purpose of antimicrobial stewardship (AMS) is, by definition, to protect this limited resource and stave off the negative consequences of its inadequate use while at the same time optimizing patient outcomes.[1] AMS programs have been implemented in thousands of hospitals around the world, in some areas by legal mandate.[2, 3] While there is increasing evidence that AMS can generally reduce drug costs, AMR and CDI in the hospital setting, we still do not know which particular AMS interventions provide the best and most sustainable improvements in antibiotic prescribing with the best cost-effectiveness.[4-6] In particular, many AMS interventions are labor-intensive and require “manual” assessment of individual situations by dedicated experts such as infectious diseases specialists or pharmacists.[7-11] This is problematic since it limits interventions to a small proportion of all prescriptions. Moreover, it threatens sustainability, since there are always competing hospital priorities resulting in limited resources for AMS programs

There is thus a need to at least partially automate AMS interventions. The 2016 AMS guidelines by the Infectious Diseases Society of America and the Society for Healthcare Epidemiology of America indicate moderate-quality evidence for the incorporation of CDSS at the time of prescribing.[12] Computerized decision support systems (CDSS) to improve antimicrobial use have been implemented before, but there is clearly a lack of high-quality studies assessing their impact on actual antimicrobial prescribing and patient outcomes. The vast majority of studies in this area are uncontrolled before-after studies which have a much higher risk of bias and lower external validity.[13] A recent systematic review of computerised decision support for antibiotic use in hospitals identified only six randomised controlled studies among the 81 studies included in the review, of which half (3) were single-site studies. [14] Another earlier systematic review, also mostly identified low-quality, single centre, before-after studies and concluded that “high quality, systematic, multi-site, comparative studies are critically needed to assist organizations in making informed decisions about the most effective IT interventions.”[15] Furthermore, existing studies often limited assessment to specific situations and settings, such as increasing guideline compliance in the treatment of UTI[16] and critically ill patients[17], and to

1  
2  
3 improve empirical antibiotic treatment for patients with suspected bacterial infections.[18]  
4 CDSS are also often overly complex, poorly designed, not integrated into the workflow,  
5 expensive, or difficult to implement in heterogeneous clinical settings.[19]  
6  
7

8 The COMPASS trial aims to address this evidence-gap by assessing through a  
9 randomised multicenter trial, if a CDSS integrated into the workflow can reduce DOT per  
10 admission in the intervention wards compared to controlled wards, over a one-year period.  
11  
12  
13

## 14 **METHODS AND ANALYSIS**

### 15 **Study setting**

16  
17  
18 COMPASS will be conducted in adult acute-care wards of three Swiss hospitals, one  
19 academic medical centre and two regional hospitals. HUG (Geneva University Hospitals) is  
20 one of the largest hospitals in Switzerland with about 1'800 beds and 700'000 patient-days  
21 per year.[20] HUG has deployed an in-house electronic health record (EHR) since 2000 and a  
22 computerized physician order entry system (CPOE) system since 2006.[21] ORL (Regional  
23 Hospital Lugano) and OSG (Regional Hospital Bellinzona) are the largest hospitals of  
24 Southern Switzerland, with respectively 306 and 228 beds, and about 100'000 and 72'000  
25 patients-days per year. Both hospitals have developed and adapted an EHR and CPOE  
26 system based on the in-house system of HUG since 2008 and 2014, respectively. All three  
27 hospitals have AMS programs with regularly updated antimicrobial prescribing guidelines,  
28 review of all positive blood cultures, regular teaching sessions for physicians, and internal  
29 and external benchmarking of antibiotic use and resistance. Dedicated ward rounds in some  
30 divisions (*e.g.* the intensive care unit and hematologic or solid organ transplant wards), are  
31 also part of the AMS program at HUG; however, these units will not be included into  
32 COMPASS. The overall framework for the COMPASS intervention is identical in all study  
33 sites; given the particularities of each setting (different EHRs, different categories of  
34 hospitals; different language; different prescribing guidelines) some details of the  
35 intervention may slightly vary between sites.  
36  
37  
38  
39  
40  
41  
42  
43  
44  
45  
46  
47  
48  
49  
50

### 51 **Intervention**

52 The intervention will consist of four components (figure 1):  
53  
54  
55  
56  
57  
58  
59  
60

- 1
- 2
- 3 (1) Decision support for antimicrobial treatment with regard to the choice of antimicrobial
- 4 drugs based on indication entry and current, local guidelines with accountable justification
- 5 for guideline deviation;
- 6
- 7
- 8 (2) Alerts for self-guided re-evaluation of antimicrobial therapy on calendar day 4 of
- 9 therapy;
- 10
- 11 (3) Decision support for the duration of antimicrobial treatment based on indication entry
- 12 and current, local guidelines with accountable justification for guideline deviation and;
- 13
- 14 (4) Regular feedback of unit-wide antimicrobial prescribing indicators
- 15
- 16
- 17

### 18 (1) Decision support for antimicrobial treatment

19  
20 When physicians prescribe a systemic antimicrobial agent (including antifungals & antivirals  
21 except antiretroviral drugs used for the treatment of HIV) in the CPOE they will be asked to  
22 select whether the treatment is used for empiric treatment, targeted treatment or  
23 prophylaxis and to select the main indication of treatment based on a pre-specified list of  
24 indications linked to an international terminology such as International Statistical  
25 Classification of Diseases and Related Health Problems 10th Revision (ICD-10) and  
26 Systematized Nomenclature of Medicine-Clinical Terms (SNOMED-CT). If a treatment  
27 recommendation exists in the local guidelines for the given indication and the treatment  
28 regimen prescribed deviates from this recommendation, the prescriber will be offered the  
29 choice to switch to the guideline-recommended treatment; otherwise prescribers will be  
30 asked to provide an “accountable justification” for the deviation from the guidelines (a  
31 predefined list of potential reasons will be provided with the availability to also enter free  
32 text). The proposed system ensures that each antibiotic prescription is linked to a  
33 retrievable indication, making it possible to assess prescribing quality and to provide specific  
34 decision support.  
35  
36  
37  
38  
39  
40  
41  
42  
43  
44  
45  
46  
47

### 48 (2) Self-guided evaluation alert

49  
50 On the fourth calendar day of antimicrobial treatment, a visual electronic alert displayed in  
51 the patient’s electronic medical chart will remind prescribers to reassess treatment with  
52 regard to intravenous-oral switch, de-escalation or stopping therapy. The alert will not be  
53 blocking (i.e. if the alert is ignored by the prescriber the antimicrobial prescription will  
54  
55  
56  
57  
58  
59  
60

1  
2  
3 remain active), it will, however, continue to be displayed until it is addressed. Furthermore,  
4 the alert will also be displayed on the “visual synopsis” of all patients hospitalized in the  
5 ward, making it possible for nursing staff to remind prescribers to address the alert.  
6  
7

8 The re-evaluation of treatment will be self-guided, i.e. there will be no decision-  
9 support guiding treatment adaptation based on patient-specific data such as vital signs,  
10 microbiologic results or use of other medications. General information useful for re-  
11 evaluation, such as iv-oral switch criteria, will be provided as info-buttons. If the  
12 antimicrobial treatment is continued or modified, prescribers will be asked to reassess the  
13 indication (since the indication may change over a course of antimicrobial treatment). If the  
14 antimicrobial treatment is modified on calendar day 3, re-evaluation will be assumed to  
15 have taken place and no alert will be displayed on day 4.  
16  
17  
18  
19  
20  
21  
22

### 23 (3) Decision support for duration of treatment

24 At the time of re-evaluation, the guideline-concordant duration will be automatically  
25 proposed. If this duration is exceeded, a justification will have to be provided.  
26  
27  
28  
29

### 30 (4) Systematic audit and feedback

31 Quality indicators of antimicrobial prescribing such as concordance with local guidelines (in  
32 terms of duration of therapy and drug) will be automatically assessed based on the  
33 information collected during the prescribing process. All physicians on a given intervention  
34 ward will receive monthly e-mails outlining the performance of the ward compared to the  
35 other participating wards and compared to the guideline recommendation (if applicable).  
36 The results will be presented graphically.  
37  
38  
39  
40  
41  
42  
43

### 44 Duration of the intervention period

45 The intervention period will last 12 months. If the intervention proves to be successful  
46 based on analyses of the data, the system will also be implemented in the control wards and  
47 the effect will continue to be monitored in all wards to assess the sustainability of the  
48 intervention after the end of the research study.  
49  
50  
51  
52  
53  
54  
55  
56  
57  
58  
59  
60

## Control

The control will consist of routine, “standard-of-care” antimicrobial stewardship as described above.

## Sample size

The sample size calculation is based on the primary outcome (DOT per admission) and has been performed taking into account the pair-matched and clustered design of the study according to the approach proposed by Hayes and Bennett.[22] Assuming 12 wards per arm, with an average size of 500 admissions, antibiotic use of 4.0 DOT/admission in the control group with a standard deviation of 1.0 (based on preliminary antibiotic use data) and a two-sided type I error of 0.05 we would have a power of 80% to detect a relative difference in average DOT/admission between the intervention and control arm of at least 7.7%. Antibiotic stewardship interventions described in the published literature have often exceeded this effect size.[23]

## Inclusion criteria and randomisation

Twenty-four acute-wards fulfilling the inclusion criteria (table 1) will be recruited by approaching the heads of the concerned departments (16 wards at HUG, 4 wards at ORL and OSG each). Acute wards will be paired according to centre, specialty (e.g., medicine, surgery, geriatrics), and baseline antibiotic use in days of therapy (DOT)/admission. Wards will be randomised 1:1 to the intervention or control arm within each pair using an online random sequence generator (figure 2). The randomisation plan will be established by personnel not directly involved in the study. Depending on the recruitment of wards, specialities may be matched across ORL and OSG since due to the smaller size these hospitals may only have one ward per specialty (e.g. visceral surgery, orthopaedics). In that case randomisation may be constrained to make sure that each hospital has at least one intervention ward in either specialty (e.g. orthopaedics or visceral surgery).



## Outcomes

Table 2 gives a detailed overview of the primary and secondary outcomes, the underlying hypothesis and the justification for the choice of outcomes.

### Primary outcome

The difference in overall systemic antibiotic use measured in days of therapy (DOT) of systemic antibiotic use per admission based on electronically recorded drug administration data (for details see table 2).[24] One DOT represents a specific antibiotic administered to an individual patient on a calendar day independent of dose and route.

### Secondary outcomes

Secondary outcomes include quantitative and qualitative antimicrobial use indicators, clinical outcomes, microbiologic outcomes, economic outcomes and user satisfaction (see table 2 for more detailed definitions).[25, 26]

### Blinding

Neither the study staff implementing the intervention, nor the physicians targeted by the intervention, nor the patients receiving treatments will be blinded to an individual ward's assignment group since the nature of the intervention makes this impossible. Extraction of the primary and secondary outcome measures will be performed primarily by administrative staff not involved in the study. The data analysts will be blinded to the treatment allocation.

### Study schedule

The intervention is scheduled to begin mid-2018.

## Analysis

Outcome variables will first be summarized across treatment and intervention groups and then explored using descriptive statistics, taking into account the matched design by sandwich variance estimators for confidence intervals. The DOT/admission at the individual level will be compared between the intervention groups using a random effects poisson model with two levels, taking into account clustering within hospitals and the matched pairs. The following confounders will be considered: sex, age, type of comorbidities and type of admission (internal medicine versus other), whereby all variables that result in a change of >5% in the coefficient for the intervention effect in bivariate regression will be added to the multivariate model, and the most parsimonious model will be selected through the conditional AIC. Collinearity will be checked through a correlation matrix, whereby the most relevant, clinical variable will be selected in case of  $R^2 > 0.8$ .

## Data collection and management

Most data will be retrieved from the hospital's data warehouses. De-identified data will be stored in password protected Microsoft Excel files on secured hospital servers. For the secondary outcome "qualitative assessment of antibiotic use" a eCRF will be created in an electronic data capture system such as REDCap (REDCap Consortium).

For analysis data will be imported into a statistical program, such as Stata (StataCorp, College Station, Texas) or "R" (R Foundation for Statistical Computing). Only investigators directly involved in the trial will have access to the data. The data will be stored on secure servers with backup systems for 10 years.

## Patient and Public Involvement

Patients and Public were not involved in the development of the research question, study design or any other part of this protocol.

## ETHICS AND DISSEMINATION

The trial has been approved by the competent ethics committees in Geneva and Ticino (CCER n° 2017-00454). A waiver of informed consent by prescribers and patients was

1  
2  
3 granted under the condition to provide an information leaflet to patients in the participating  
4 wards. Several publications in peer-reviewed journals are planned from this trial: these will  
5 include the description of the development of the intervention, and main findings of the  
6 trial. Furthermore, the findings will be presented at national and international conferences.  
7  
8  
9

## 10 11 12 **DISCUSSION**

13  
14  
15 To our knowledge the COMPASS trial will be one of the first multicentre, cluster randomised  
16 controlled trials to assess whether a pragmatic CDSS integrated into the electronic health  
17 record can reduce overall antibiotic use in a diverse setting of hospitals. Our study has  
18 several strengths and limitations which are outlined in the article summary. COMPASS  
19 addresses many of the limitations of previous studies regarding the impact of CDSS on  
20 antimicrobial use in hospitals.[13] A limitation of COMPASS is the fact that the combination  
21 of different interventions will make it difficult to identify which component is the most  
22 effective; this can hopefully be addressed in further research. We believe that COMPASS is  
23 innovative in combining relatively new strategies for AMS, such as “accountable  
24 justification” with well-established strategies like audit and feed-back leveraging the  
25 potentials of the electronic health record.[27, 28] If effective, similar systems could be  
26 adapted in many hospitals given the relatively “simple” design of the CDSS intervention.  
27  
28  
29  
30  
31  
32  
33  
34  
35  
36  
37  
38  
39  
40  
41  
42  
43  
44  
45  
46  
47  
48  
49  
50  
51  
52  
53  
54  
55  
56  
57  
58  
59  
60

## REFERENCES

1. Dyar OJ, Huttner B, Schouten J, et al. What is antimicrobial stewardship? *Clin Microbiol Infect* 2017;23:793-8.
2. Trivedi KK, Dumartin C, Gilchrist M, et al. Identifying best practices across three countries: hospital antimicrobial stewardship in the United Kingdom, France, and the United States. *Clin Infect Dis* 2014;59 Suppl 3:S170-8.
3. Howard P, Pulcini C, Levy Hara G, et al. An international cross-sectional survey of antimicrobial stewardship programmes in hospitals. *J Antimicrob Chemother* 2015;70:1245-55.
4. Davey P, Marwick CA, Scott CL, et al. Interventions to improve antibiotic prescribing practices for hospital inpatients. *Cochrane Database Syst Rev* 2017;2:CD003543.
5. Baur D, Gladstone BP, Burkert F, et al. Effect of antibiotic stewardship on the incidence of infection and colonisation with antibiotic-resistant bacteria and *Clostridium difficile* infection: a systematic review and meta-analysis. *Lancet Infect Dis* 2017;17:990-1001.
6. Naylor NR, Zhu N, Hulscher M, et al. Is antimicrobial stewardship cost-effective? A narrative review of the evidence. *Clin Microbiol Infect* 2017;23:806-11.
7. Lesprit P, de Pontfarcy A, Esposito-Farese M, et al. Postprescription review improves in-hospital antibiotic use: a multicenter randomized controlled trial. *Clin Microbiol Infect* 2015;21:180 e1-7.
8. Senn L, Burnand B, Francioli P, et al. Improving appropriateness of antibiotic therapy: randomized trial of an intervention to foster reassessment of prescription after 3 days. *J Antimicrob Chemother* 2004;53:1062-7.
9. Manuel O, Burnand B, Bady P, et al. Impact of standardised review of intravenous antibiotic therapy 72 hours after prescription in two internal medicine wards. *J Hosp Infect* 2010;74:326-31.
10. Cosgrove SE, Seo SK, Bolon MK, et al. Evaluation of postprescription review and feedback as a method of promoting rational antimicrobial use: a multicenter intervention. *Infect Control Hosp Epidemiol* 2012;33:374-80.
11. Uckay I, Vernaz-Hegi N, Harbarth S, et al. Activity and impact on antibiotic use and costs of a dedicated infectious diseases consultant on a septic orthopaedic unit. *J Infect* 2009;58:205-12.
12. Barlam TF, Cosgrove SE, Abbo LM, et al. Implementing an Antibiotic Stewardship Program: Guidelines by the Infectious Diseases Society of America and the Society for Healthcare Epidemiology of America. *Clin Infect Dis* 2016.
13. de Kraker MEA, Abbas M, Huttner B, et al. Good epidemiological practice: a narrative review of appropriate scientific methods to evaluate the impact of antimicrobial stewardship interventions. *Clin Microbiol Infect* 2017;23:819-25.
14. Curtis CE, Al Bahar F, Marriott JF. The effectiveness of computerised decision support on antibiotic use in hospitals: A systematic review. *PLoS One* 2017;12:e0183062.
15. Baysari MT, Lehnbohm EC, Li L, et al. The effectiveness of information technology to improve antimicrobial prescribing in hospitals: A systematic review and meta-analysis. *Int J Med Inform* 2016;92:15-34.

16. Demonchy E, Dufour JC, Gaudart J, et al. Impact of a computerized decision support system on compliance with guidelines on antibiotics prescribed for urinary tract infections in emergency departments: a multicentre prospective before-and-after controlled interventional study. *J Antimicrob Chemother* 2014;69:2857-63.
17. Nachtigall I, Tafelski S, Deja M, et al. Long-term effect of computer-assisted decision support for antibiotic treatment in critically ill patients: a prospective 'before/after' cohort study. *BMJ Open* 2014;4:e005370.
18. Paul M, Andreassen S, Tacconelli E, et al. Improving empirical antibiotic treatment using TREAT, a computerized decision support system: cluster randomized trial. *J Antimicrob Chemother* 2006;58:1238-45.
19. Rawson TM, Moore LSP, Hernandez B, et al. A systematic review of clinical decision support systems for antimicrobial management: are we failing to investigate these interventions appropriately? *Clin Microbiol Infect* 2017.
20. HUG en bref - chiffres clés 2014. [https://www.hug-ge.ch/sites/interhug/files/images/hug\\_en\\_bref/chiffres-cles/chiffres-cles-2016.pdf](https://www.hug-ge.ch/sites/interhug/files/images/hug_en_bref/chiffres-cles/chiffres-cles-2016.pdf)
21. Iten A, Perrier A, Lovis C. [Deployment of a computerized physician order entry: description of the process and challenges]. *Rev Med Suisse* 2006;2:2344-6, 8-9.
22. Hayes RJ, Bennett S. Simple sample size calculation for cluster-randomized trials. *Int J Epidemiol* 1999;28:319-26.
23. Davey P, Brown E, Charani E, et al. Interventions to improve antibiotic prescribing practices for hospital inpatients. *Cochrane Database Syst Rev* 2013;4:CD003543.
24. Moehring RW, Anderson DJ, Cochran RL, et al. Expert Consensus on Metrics to Assess the Impact of Patient-Level Antimicrobial Stewardship Interventions in Acute-Care Settings. *Clin Infect Dis* 2017;64:377-83.
25. Stanić Benić M, Milanic R, Monnier A, et al. Metrics for quantifying antibiotic use in the hospital setting: results from a systematic review and consensus procedure. *J Antimicrob Chemother*.
26. Monnier A, Schouten J, Le Maréchal M, et al. Quality indicators for responsible antibiotic use in the inpatient setting: a systematic review followed by an international multidisciplinary consensus procedure *J Antimicrob Chemother* 2018.
27. Meeker D, Linder JA, Fox CR, et al. Effect of Behavioral Interventions on Inappropriate Antibiotic Prescribing Among Primary Care Practices: A Randomized Clinical Trial. *JAMA* 2016;315:562-70.
28. Ivers N, Jamtvedt G, Flottorp S, et al. Audit and feedback: effects on professional practice and healthcare outcomes. *Cochrane Database Syst Rev* 2012:CD000259.
29. Dik JW, Hendrix R, Poelman R, et al. Measuring the impact of antimicrobial stewardship programs. *Expert Rev Anti Infect Ther* 2016;14:569-75.
30. Morris AM, Brener S, Dresser L, et al. Use of a structured panel process to define quality metrics for antimicrobial stewardship programs. *Infect Control Hosp Epidemiol* 2012;33:500-6.
31. Morris AM. Antimicrobial Stewardship Programs: Appropriate Measures and Metrics to Study their Impact. *Curr Treat Options Infect Dis* 2014;6:101-12.
32. report Et. Proposals for EU guidelines on the prudent use of antimicrobials in humans. 2017. <https://ecdc.europa.eu/en/publications-data/proposals-eu-guidelines-prudent-use-antimicrobials-humans> (accessed February 27<sup>th</sup>, 2018).
33. Akpan MR, Ahmad R, Shebl NA, et al. A Review of Quality Measures for Assessing the Impact of Antimicrobial Stewardship Programs in Hospitals. *Antibiotics (Basel)* 2016;5.

- 1  
2  
3 34. Ibrahim NH, Maruan K, Mohd Khairy HA, et al. Economic Evaluations on  
4 Antimicrobial Stewardship Programme: A Systematic Review. *J Pharm Pharm Sci*  
5 2017;20:397-406.  
6 35. Schmitt S, McQuillen DP, Nahass R, et al. Infectious diseases specialty intervention is  
7 associated with decreased mortality and lower healthcare costs. *Clin Infect Dis* 2014;58:22-  
8 8.  
9 36. Polk RE, Hohmann SF, Medvedev S, et al. Benchmarking risk-adjusted adult  
10 antibacterial drug use in 70 US academic medical center hospitals. *Clin Infect Dis*  
11 2011;53:1100-10.  
12  
13  
14  
15  
16  
17  
18  
19  
20  
21  
22  
23  
24  
25  
26  
27  
28  
29  
30  
31  
32  
33  
34  
35  
36  
37  
38  
39  
40  
41  
42  
43  
44  
45  
46  
47  
48  
49  
50  
51  
52  
53  
54  
55  
56  
57  
58  
59  
60

## AUTHORS' CONTRIBUTIONS

BDH conceived the original idea for this study, which was further developed with all authors. BDH, EB, SH, LK and RM secured funding for the study. BDH and GC wrote the first draft of this manuscript. MdK provided input regarding the sample size calculations and statistical analysis. The manuscript was reviewed and edited by all authors: MdK, BWS, RV, SH, LK, LE, RM, EB.

## FUNDING STATEMENT

This work is supported by the Swiss National Science Foundation (grant number 407240\_167079) in the context of the Swiss National Research Programme 72 "Antimicrobial Resistance" ([www.nfp72.ch](http://www.nfp72.ch)).

## COMPETING INTERESTS STATEMENT

All authors declare no competing interests.

## ACKNOWLEDGMENT

We would like to thank all members of the COMPASS study team for the valuable contribution in setting up the study. The COMPASS study team consists of members from Geneva University Hospitals and of the Ente Ospedaliero Cantonale : Carlo Balmelli; Nicolò Centemero; Valentina Coray; Serge Da Silva; Emmanuel Durand; Christophe Marti; Lorenzo Moja; Francesco Pagnamenta; Marie-Françoise Piuz; Javier Portela; Virginie Prendki; Jérôme Stirnemann; Nathalie Vernaz.

**Table 1. Inclusion and exclusion criteria**

|                              | <b>Inclusion criteria</b>                                                                                                                  | <b>Exclusion criteria</b>                                                                                                                                                                                                                                                                 |
|------------------------------|--------------------------------------------------------------------------------------------------------------------------------------------|-------------------------------------------------------------------------------------------------------------------------------------------------------------------------------------------------------------------------------------------------------------------------------------------|
| <b>Cluster level [wards]</b> | <ul style="list-style-type: none"> <li>• Acute-care wards with at least 150 admissions/year</li> <li>• Use of CPOE</li> </ul>              | <ul style="list-style-type: none"> <li>• Emergency room(s)</li> <li>• Outpatient clinics</li> <li>• Overflow wards</li> <li>• Absence of a “matchable” ward regarding specialty and baseline antibiotic use</li> <li>• Hematopoietic stem cell transplant wards</li> <li>• ICU</li> </ul> |
| <b>Physician level</b>       | <ul style="list-style-type: none"> <li>• All physicians involved in antibiotic prescribing decisions in the participating wards</li> </ul> | <ul style="list-style-type: none"> <li>• None</li> </ul>                                                                                                                                                                                                                                  |
| <b>Patient level</b>         | <ul style="list-style-type: none"> <li>• All patients hospitalized in the participating wards</li> </ul>                                   | <ul style="list-style-type: none"> <li>• None</li> </ul>                                                                                                                                                                                                                                  |

**CPOE:** computerized physician order entry



**Table 2. Main study outcomes and corresponding hypotheses evaluated within the COMPASS trial**

|                                                                       | <b>Outcome component</b>                                                                                                                                                                                                                                | <b>Relevant hypothesis</b><br><br>(If not otherwise stated the hypothesis refers to the expected effect of the intervention) | <b>Rationale for outcome selection</b>                                                                                                                                                                                                                                                                                                                                                                                                                                                                       |
|-----------------------------------------------------------------------|---------------------------------------------------------------------------------------------------------------------------------------------------------------------------------------------------------------------------------------------------------|------------------------------------------------------------------------------------------------------------------------------|--------------------------------------------------------------------------------------------------------------------------------------------------------------------------------------------------------------------------------------------------------------------------------------------------------------------------------------------------------------------------------------------------------------------------------------------------------------------------------------------------------------|
| <b>Primary outcome</b>                                                | Days of therapy (DOT) of antibiotics <sup>a</sup> per admission                                                                                                                                                                                         | Reduction in antibiotic use through shortening of duration of treatment and reduction in combination therapies               | DOT is an easily measurable objectively assessable outcome that is supported by expert consensus.[24] Admission was chosen as the denominator for the primary outcome rather than patient-days since reductions in antimicrobial treatment duration (reflected by a reduction in DOT) may induce a reduction of length of stay (LOS). This may have as consequence that DOT per patient-days changes little despite a reduction in antibiotic exposure since both the numerator and denominator are reduced. |
| <b>Secondary outcomes: quantitative antimicrobial use<sup>b</sup></b> | DOT per 100 patient-days (PD)<br><br>Defined Daily Doses (DDD) per 100 PD and per admission<br><br>Antimicrobial days (AD) <sup>c</sup> per 100 PD and per admission<br><br>Days per treatment period overall and for specific indications <sup>d</sup> | Reduction in antimicrobial use through shortening of duration of treatment and reduction in combination therapies            | Defined daily doses (DDD) are the most widely used metric for antimicrobial consumption and are therefore most suitable for comparisons with other settings. Antimicrobial days (AD) are a further metric that has been proposed to assess antibiotic use. Both patient-days and admissions have been proposed as denominators.[24, 29-32]<br><br>A treatment period is defined as antibiotic treatment not interrupted by more than one calendar day or discharge                                           |
| <b>Secondary outcomes: clinical outcomes</b>                          | 30 day-mortality                                                                                                                                                                                                                                        | The intervention is safe and does not result in an increase in mortality or                                                  | Clinical outcomes are included to demonstrate the safety of the intervention, the improvement of quality of care and the absence of unintended consequences. The clinical outcomes                                                                                                                                                                                                                                                                                                                           |

1  
2  
3  
4  
5  
6  
7  
8  
9  
10  
11  
12  
13  
14  
15  
16  
17  
18  
19  
20  
21  
22  
23  
24  
25  
26  
27  
28  
29  
30  
31  
32  
33  
34  
35  
36  
37  
38  
39  
40  
41  
42  
43  
44  
45  
46  
47

|                                                          |                                                                                                                                                                               |                                                                                       |                                                                                                                                                                                                                                                                                                                                                                                                                                                                                                                                                                                                                                                                                                           |
|----------------------------------------------------------|-------------------------------------------------------------------------------------------------------------------------------------------------------------------------------|---------------------------------------------------------------------------------------|-----------------------------------------------------------------------------------------------------------------------------------------------------------------------------------------------------------------------------------------------------------------------------------------------------------------------------------------------------------------------------------------------------------------------------------------------------------------------------------------------------------------------------------------------------------------------------------------------------------------------------------------------------------------------------------------------------------|
|                                                          | In hospital mortality                                                                                                                                                         | readmissions                                                                          | are chosen based on their objectivity, the ease of obtaining the data and expert consensus. [29, 33]                                                                                                                                                                                                                                                                                                                                                                                                                                                                                                                                                                                                      |
|                                                          | Unplanned hospital readmissions within 30 days after discharge                                                                                                                |                                                                                       |                                                                                                                                                                                                                                                                                                                                                                                                                                                                                                                                                                                                                                                                                                           |
|                                                          | Hospital length of stay                                                                                                                                                       | Similar length of stay or a reduction in the length of stay                           |                                                                                                                                                                                                                                                                                                                                                                                                                                                                                                                                                                                                                                                                                                           |
|                                                          | Intensive or intermediate care unit admission from COMPASS wards                                                                                                              | No increase in the number of intensive care unit or intermediate care unit admissions |                                                                                                                                                                                                                                                                                                                                                                                                                                                                                                                                                                                                                                                                                                           |
| <b>Secondary outcomes: qualitative antimicrobial use</b> | Concordance of empirical antibiotic therapy with local guidelines (taking into account justified exceptions) with regard to the choice of molecules and duration of treatment | Improved quality of antimicrobial use                                                 | Improving the quality of antimicrobial use is one of the key goals of antimicrobial stewardship (AMS). Valid, reliable and universally accepted metrics for measuring appropriateness of antimicrobial use are difficult to define and labour-intensive to assess.[31] Qualitative antimicrobial use outcomes will be assessed through manual review of a random selection of charts (at least 50 charts per ward over the 12 months period) by infectious diseases specialists using pre-specified criteria for appropriateness. A sub-selection of charts (about 10% of the sample) will be reviewed independently by 2 reviewers (blinded to ward assignment) to determine inter-observer variability. |
|                                                          | Switch to oral therapy when appropriate                                                                                                                                       |                                                                                       |                                                                                                                                                                                                                                                                                                                                                                                                                                                                                                                                                                                                                                                                                                           |
|                                                          | De-escalation of antimicrobial therapy by calendar day 4 of treatment                                                                                                         |                                                                                       |                                                                                                                                                                                                                                                                                                                                                                                                                                                                                                                                                                                                                                                                                                           |
|                                                          | Appropriate diagnostic                                                                                                                                                        |                                                                                       |                                                                                                                                                                                                                                                                                                                                                                                                                                                                                                                                                                                                                                                                                                           |

|                                                                                        | exams                                                                                                                                                                                                                                                                                                                  |                                                                                                                                               |                                                                                                                                                                                                                                                                                                                                                                                                                                                                |
|----------------------------------------------------------------------------------------|------------------------------------------------------------------------------------------------------------------------------------------------------------------------------------------------------------------------------------------------------------------------------------------------------------------------|-----------------------------------------------------------------------------------------------------------------------------------------------|----------------------------------------------------------------------------------------------------------------------------------------------------------------------------------------------------------------------------------------------------------------------------------------------------------------------------------------------------------------------------------------------------------------------------------------------------------------|
| <b>Secondary outcomes: microbiologic outcomes and healthcare associated infections</b> | <p>Incidence of healthcare facility onset <i>Clostridium difficile</i> denominated per 10 000 PD and admission (attributed to unit)</p> <p>Incident clinical cultures with multi-drug resistant organisms (MRSA, ESBL-E, CPE, VRE, multidrug resistant <i>P. aeruginosa</i>) denominated per 1000 PD and admission</p> | <p>Reduced incidence of healthcare facility onset <i>C. difficile</i> infection</p> <p>Reduced incidence of multidrug-resistant organisms</p> | <p>Limiting <i>Clostridium difficile</i> infections (CDI) and the emergence and transmission of AMR is one of the key goals of AMS. There is expert consensus that the incidence of CDI and drug-resistant pathogens are key metrics to assess the impact of AMS.[24]</p> <p>Since these outcomes are influenced by numerous other factors and would require a very large sample size, they are secondary outcomes and not primary outcomes in this study.</p> |
| <b>Secondary outcomes physician satisfaction</b>                                       | User satisfaction with the system                                                                                                                                                                                                                                                                                      | Users will be satisfied with the system                                                                                                       | A major obstacle to the use of CDSS is the lack of buy-in from prescribers and unintended consequences such as “alert fatigue”.                                                                                                                                                                                                                                                                                                                                |
| <b>Secondary outcomes: economic</b>                                                    | <p>Costs of administered antimicrobials (overall and by class) per admission and per admission receiving antibiotics</p> <p>Costs of the intervention</p> <p>Total costs of hospitalisation</p>                                                                                                                        | Decreased overall direct costs for antimicrobials                                                                                             | Reducing the cost of antimicrobial therapy is a goal secondary to that of improving quality of care and patient safety but is one of great interest to administrators.[34] All costs will be assessed from the perspective of the hospital.                                                                                                                                                                                                                    |
| <b>Other outcomes</b>                                                                  | Number of infectious diseases consultations                                                                                                                                                                                                                                                                            | No difference in the number of infectious diseases consultations between the groups                                                           | An unintended consequence of the intervention may be an increase in the requests for infectious diseases consultations which may impact antibiotic use and patient outcomes.[35]                                                                                                                                                                                                                                                                               |

<sup>a</sup> The primary outcome will be DOT for antibiotics belonging to Anatomical Therapeutic Chemical (ATC) Classification System class J01 (anti-infectives for systemic use) plus oral metronidazole (P01AB01), oral vancomycin (A07AA09), rifampicin (J04AB02) and fidaxomicin (A07AA12).

<sup>b</sup> In addition to overall antibiotic use as defined above, outcomes for DOT and DDD will also be assessed for different antibiotic classes, for antifungals, for non-HIV antivirals and for selected specific antibiotics.

<sup>c</sup> The metric “Antimicrobial day” (AD) is equivalent to “Length of Therapy” (LOT)[36]

<sup>d</sup> To make a comparison possible between intervention and control wards the “diagnosis” will be based on administrative discharge data. The most common infections (Community acquired pneumonia, upper urinary tract infection etc.) will be analyzed.

CPE : carbapenemase-producing *Enterobacteriaceae*; ESBL-E : extended-spectrum beta-lactamase producing *Enterobacteriaceae*; MRSA : methicillin-resistant *Staphylococcus aureus*; VRE: vancomycin-resistant enterococci.

## Figure 1: COMPASS interventions

Legend: (1) Decision support for antimicrobial treatment will be provided when physician prescribes systemic antimicrobial agent (including antifungals & antivirals except antiretroviral drugs used for the treatment of HIV) in the CPOE. (2) On the fourth calendar day of antimicrobial treatment, a visual electronic alert displayed in the patient's electronic medical chart will remind prescribers to reassess treatment with regard to intravenous-oral switch, de-escalation or stopping therapy. (3) At the time of re-evaluation, the guideline-concordant duration will be automatically proposed. If this duration is exceeded, a justification will have to be provided. (4) All physicians on a given intervention ward will receive monthly e-mails outlining the performance of the ward compared to the other participating wards and compared to the guideline recommendation.

## Figure 2: Randomisation scheme

Legend: Twenty-four acute-wards fulfilling the inclusion criteria will be recruited (16 wards at HUG, 4 wards at ORL and OSG each). Acute wards will be paired according to centre, specialty (e.g., medicine, surgery, geriatrics), and baseline antibiotic use in days of therapy (DOT)/admission. Wards will be randomised 1:1 to the intervention or control arm within each pair using an online random sequence generator.

1  
2  
3  
4  
5  
6  
7  
8  
9  
10  
11  
12  
13  
14  
15  
16  
17  
18  
19  
20  
21  
22  
23  
24  
25  
26  
27  
28  
29  
30  
31  
32  
33  
34  
35  
36  
37  
38  
39  
40  
41  
42  
43  
44  
45  
46  
47  
48  
49  
50  
51  
52  
53  
54  
55  
56  
57  
58  
59  
60

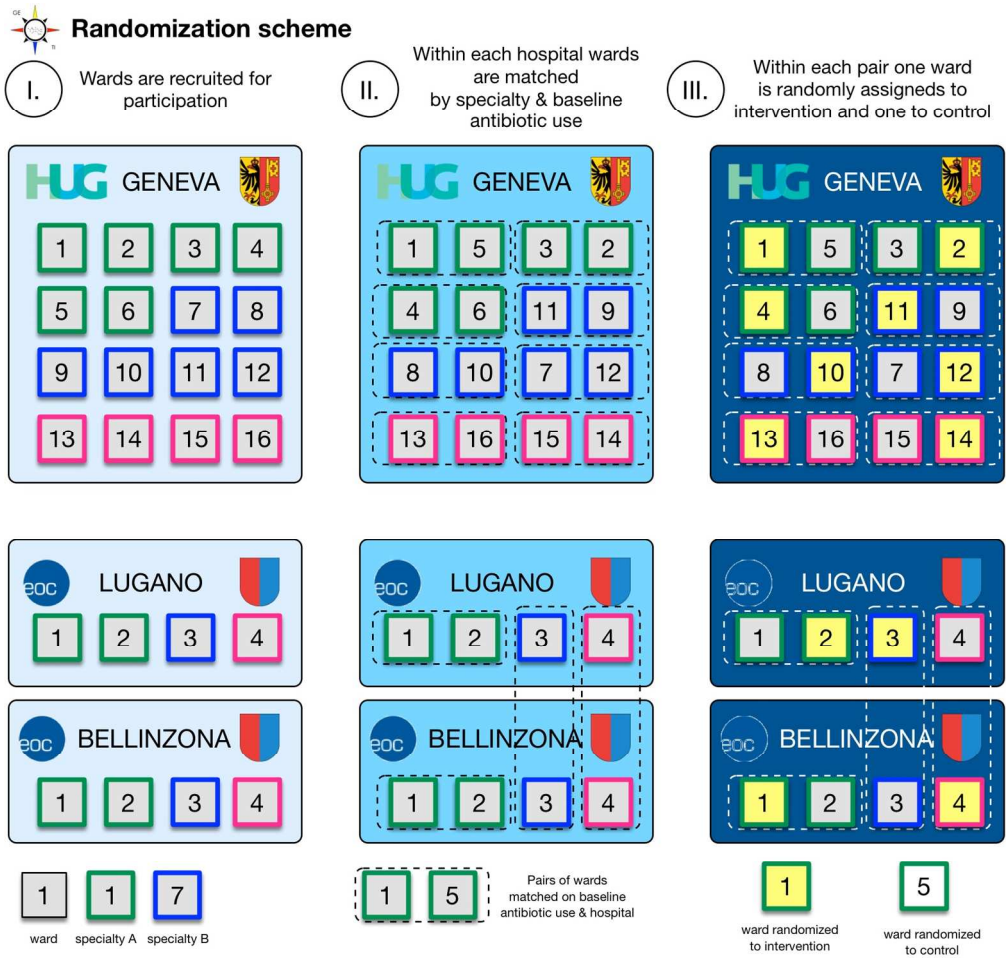

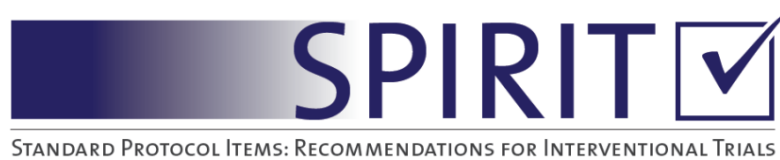

SPIRIT 2013 Checklist: Recommended items to address in a clinical trial protocol and related documents\*

| Section/item                      | Item No | Description                                                                                                                                                                                                                                                                              | Reported on page /line No |
|-----------------------------------|---------|------------------------------------------------------------------------------------------------------------------------------------------------------------------------------------------------------------------------------------------------------------------------------------------|---------------------------|
| <b>Administrative information</b> |         |                                                                                                                                                                                                                                                                                          |                           |
| Title                             | 1       | Descriptive title identifying the study design, population, interventions, and, if applicable, trial acronym                                                                                                                                                                             | Page 1                    |
| Trial registration                | 2a      | Trial identifier and registry name. If not yet registered, name of intended registry                                                                                                                                                                                                     | Page 2                    |
|                                   | 2b      | All items from the World Health Organization Trial Registration Data Set                                                                                                                                                                                                                 | Pages 11-12               |
| Protocol version                  | 3       | Date and version identifier                                                                                                                                                                                                                                                              | All pages                 |
| Funding                           | 4       | Sources and types of financial, material, and other support                                                                                                                                                                                                                              | Page 2 and 41             |
| Roles and responsibilities        | 5a      | Names, affiliations, and roles of protocol contributors                                                                                                                                                                                                                                  | Page 16-17                |
|                                   | 5b      | Name and contact information for the trial sponsor                                                                                                                                                                                                                                       | Page 16                   |
|                                   | 5c      | Role of study sponsor and funders, if any, in study design; collection, management, analysis, and interpretation of data; writing of the report; and the decision to submit the report for publication, including whether they will have ultimate authority over any of these activities | Page 15                   |
|                                   | 5d      | Composition, roles, and responsibilities of the coordinating centre, steering committee, endpoint adjudication committee, data management team, and other individuals or groups overseeing the trial, if applicable (see Item 21a for data monitoring committee)                         | Page 17                   |
| <b>Introduction</b>               |         |                                                                                                                                                                                                                                                                                          |                           |
| Background and rationale          | 6a      | Description of research question and justification for undertaking the trial, including summary of relevant studies (published and unpublished) examining benefits and harms for each intervention                                                                                       | Page 22                   |
|                                   | 6b      | Explanation for choice of comparators                                                                                                                                                                                                                                                    | Page 23                   |
