# Supplementary material for: Study protocol for a multicentre, cluster randomised, superiority trial evaluating the impact of computerised decision support, audit and feedback on antibiotic use: the COMPuterized Antibiotic Stewardship Study (COMPASS)
Source: PubMed Central journal article supplement — BMJ Open. 2018 Jun 27;8(6):e022666. doi: 10.1136/bmjopen-2018-022666 (PMC6042555; doi:10.1136/bmjopen-2018-022666), 2018-06-27
Supplement: bmjopen-2018-022666.reviewer_comments.pdf [file bmjopen-2018-022666.reviewer_comments.pdf]

## PEER REVIEW HISTORY

BMJ Open publishes all reviews undertaken for accepted manuscripts. Reviewers are asked to complete a checklist review form (<http://bmjopen.bmj.com/site/about/resources/checklist.pdf>) and are provided with free text boxes to elaborate on their assessment. These free text comments are reproduced below.

## ARTICLE DETAILS

|                            |                                                                                                                                                                                                                                 |
|----------------------------|---------------------------------------------------------------------------------------------------------------------------------------------------------------------------------------------------------------------------------|
| <b>TITLE (PROVISIONAL)</b> | A study protocol for a multicentre, cluster-randomised, superiority trial evaluating the impact of computerized decision support, audit and feedback on antibiotic use: The Computerized Antibiotic Stewardship Study (COMPASS) |
| <b>AUTHORS</b>             | Catho, Gaud; de Kraker, Marlieke; Waldspühl Suter, Brigitte; Valotti, Roberta; Harbarth, Stephan; Kaiser, Laurent; Elzi, Luigia; Meyer, Rodolphe; Bernasconi, Enos; Huttner, Benedikt D                                         |

This article was not externally reviewed at BMJ Open. Protocols that have been independently assessed prior to submission to BMJ Open are usually fast-tracked to publication on the grounds that further substantial changes will not be possible. This independent assessment will usually be external, independent review for both a substantial grant award from a non-commercial or government funder and ethics approval.
